# Supplementary material for: Public priorities on locally-driven sea level rise planning on the East Coast of the United States
Source: PeerJ. 2020 May 4;8:e9044. doi: 10.7717/peerj.9044 (PMC7204830; doi:10.7717/peerj.9044)
Supplement: Data S1 — This data set contains the responses of 503 persons affiliated with coastal communities in the East Coast of the United States. There is no personally identifiable information contained within this data set. There are 26 questions in the survey, including the consent form, 15 questions about priorities and preferences in developing community-based sea level rise plans, and 10 demographic questions (7 asked in the survey and 3 provided by the survey company). Topics include priorities for inclusion in a plan, methods to fund a plan and subsequent action, and methods to resolve conflict around sea level rise planning. In addition to the results, the full details of the questions are included. [file peerj-08-9044-s001.xlsx]

## Sheet: Survey Information
	Dataset Title	Public survey on priorities and preferences in developing locally driven sea level rise plans in eastern coastal states in December 2017
	Copyright and Licensing	Copyright © 2019 Adam T. Carpenter
		Licensed under a Creative Commons Attribution 4.0 International (CC BY 4.0 License)
	Author Contact Info	acarpen8@masonlive.gmu.edu
		ORCID 0000-0002-9688-8088
	About this Survey	George Mason University IRB approval number: IRBNet 1168842-1
		This survey was executed by Survata
		Survey collection took place 2017-12-20 (initiated after IRB determination was received) through 2017-12-22
	Description of Data	This data set contains the responses of 503 persons affiliated with coastal communities in the East Coast of the United States. There is no personally identifiable information contained within this data set. There are 26 questions in the survey, including the consent form, 15 questions about priorities and preferences in developing community-based sea level rise plans, and 10 demographic question…

## Sheet: Survey Questions
		Note: Click on the embedded PDF below to view all of the survey questions
The questions are also posted here:
Question Type	Question Number	Question Text	Response Type	Likert Key	Sub-question 1	Sub-question 2	Sub-question 3	Sub-question 4	Sub-question 5	Sub-question 6	Sub-question 7	Sub-question 8	Sub-question 9	Sub-question 10	Sub-question 11	Sub-question 12	Sub-question 13	Sub-question 14	Sub-question 15
Screening	1	Consent Form (George Mason University IRB Approval 1168842-1)	Agree / Disagree	N/A	N/A
Screening	2	Do you live in, work in, or regularly visit a coastal community in the east coast of the United States?	Select one or more	N/A	I work in a coastal community	I live in a coastal community	I regularly visit a coastal community	None of the above
Primary	3	Please state the importance of the following issues in your community	Likert 1-5	Very unimportant (1), Somewhat unimportant (2), Neither important nor unimportant (3), Somewhat important (4), Very important (5)	Helping people with limited resources	Reducing taxes	Growing the economy	Protecting against future flooding	Preparing for climate change	Maintaining utilities and related infrastructure	Protecting the environment	Maintaining roads and other infrastructure	Preparing for sea level rise	Protecting property from natural disasters
Primary	4	In your community, how important are the following components in preparing for future flooding and sea level rise?	Likert 1-5	Very unimportant (1), Somewhat unimportant (2), Neither important nor unimportant (3), Somewhat important (4), Very important (5)	Developing maps and tools to learn where flooding will and won't likely cause damage	Educating the community on the causes of flooding and sea level rise	Calculating the most cost-effective places and things to protect	Building physical barriers (sea walls, levies, dunes, etc.) to protect against flooding	Preparing to respond and/or evacuate when flooding happens	Implementing required policies to reduce future flood damage	Working in the community to implement voluntary protections	Finding ways to postpone making changes until more research is done
Primary	5	Are there any other components to preparing for future flooding and sea level rise that are important?	Freeform	N/A	N/A
Primary	6	How vulnerable is your community to damage from the following hazards?	Likert 1-5	Not at all vulnerable (1), Somewhat vulnerable (2), Vulnerable (3), Highly vulnerable (4), Exceptionally vulnerable (5)	Repeated flooding from high tides	Other types of natural disasters	Increased flooding if sea level rises in the future	Water surge damage from hurricanes and severe storms
Primary	7	Please rate how high a priority protecting each of the following items in your community from flooding and future sea level rise should be	Likert 1-5	Not at all a priority (1), Somewhat a priority (2), A moderate priority (3), A high priority (4), An exceptionally high priority (5)	Sewer / Wastewater collection and treatment	Electric power	Natural wetlands, wildlife areas, etc	Natural Gas / Heating fuel distribution	Roads and highways	Railroads, subways, busses & stations	Beaches and similar coastal areas	Drinking Water	Individual homes and residences	Houses of worship	Parks and public spaces	Government facilities (includes police & fire depts)	Individual businesses, offices, shops, etc.	Stormwater and Green Infrastructure	Places of cultural importance
Primary	8	Are there any other items in your community that should be priorities for protection?	Freeform	N/A	N/A
Primary	9	Should preparing for future flooding and sea level rise be mostly private sector (and individual) responsibility, public sector (and government) responsibility or a mix of both?	Select one	N/A	Entirely Private Sector	Mostly Private Sector	Equal Mix of Public and Private Sector	Mostly Public Sector	Entirely Public Sector
Primary	10	How useful are the following methods in determining how much money should be spent protecting against floods and the effects of future sea level rise?	Likert 1-5	Not at all useful (1), Somewhat useful (2), Useful (3), Highly useful (4), Exceptionally useful (5)	Encourage insurance companies to require upgrades on homes/businesses to reduce risks as a condition of insurance	Set policies to encourage individuals/businesses to pay for their own protection to minimize local government costs	Hold public meetings to identify highest priorities and vote on methods to pay for them	Increase funding by raising local fees for beaches and other amenities	Increase funding for protection by cutting other local programs and services	Increase funding by raising local sales taxes	Increase funding by raising local property taxes	Use only money already used for protection (no change)	Minimize use of local taxes but utilize state/federal money when available	Increase funding by raising local income taxes
Primary	11	Are there any other methods to determine how much money should be spent protecting against floods and the effects of future sea level rise?	Freeform	N/A	N/A
Primary	12	No type of protection is foolproof. Advanced protections are more complicated and expensive, while basic protections will fail more often. How strong should your community make its flooding and sea level rise protection?	Select one each for (1) fails causing minor flooding and (2) fails causing major flooding	N/A	Fails less than 10% of years (1 in 10 years average)	Fails less than 2.5% of years (1 in 50 years average)	Fails less than 1% of years (1 in 100 years average)	Fails less than 0.2% of years (1 in 500 years average)	Fails less than 0.1% of years (1 in 1,000 years average)
Primary	13	How helpful are the following techniques in resolving potential conflict in developing a plan to protect against flooding from sea level rise in your community?	Likert 1-5	Not at all helpful (1), Somewhat helpful (2), Helpful (3), Very helpful (4), Exceptionally helpful (5)	Hold public meetings to identify ways to resolve conflicts	Perform cost and benefit analysis on various ways to move forward	Start with measures that have the greatest public support	Increase educational efforts through the media about the risks and impacts of flooding	Hold votes on options to resolve disputes	Discuss with preparedness experts about ways to improve protection against floods	Make some measures optional for individual homes and businesses	Discuss with scientists about the chances and locations of future flooding
Primary	14	Are there any other techniques to resolve potential conflict in your community?	Freeform	N/A	N/A
Primary	15	How appropriate are the following responses to protect against flooding and future sea level rise?	Likert 1-5	Very inappropriate (1), Somewhat inappropriate (2), Neither appropriate nor inappropriate (3), Somewhat appropriate (4), Very appropriate (5)	Prevent new development on the most vulnerable areas	Develop and enhance man-made physical barriers (sea walls, levies, etc.)	Require new structures to be built at higher elevations	Harden public infrastructure (roads, utilities, etc.) against damage	Increase cost of insuring high-risk areas	Develop and enhance natural physical barriers (such as wetlands or sand dunes)	Raise the elevation of existing structures	Don't provide assistance for areas at highest risk	Develop and enhance early warning systems to notify residents about upcoming floods	Remove existing development from the most vulnerable areas over time
Primary	16	Are there any other responses to protect against flooding and future sea level rise in your community?	Freeform	N/A	N/A
Demographic	17	Please indicate your annual household income	Select one	N/A	Less than $25,000	$25,000 to $34,000	$35,000 to $49,000	$50,000 to $74,999	$75,000 to $99,999	$100,000 to $149,000	$150,000 to $199,999	$200,000 or more	Decline to Answer
Demographic	18	How much would you consider yourself an environmentalist?	Select one	N/A	Not at all	Somewhat	Moderately	Highly	Exceptionally
Demographic	19	Which of the following most closely matches your job title?	Select one	N/A	President or Owner	C-Level Executive (CIO, CTO, COO, CMO, etc.)	Senior Vice President	Vice President	Director	Senior Manager	Manager	Analyst/Associate	Entry Level	Student	Retired
Demographic	20	Please indicate your highest level of education completed	Select one	N/A	No formal education	8t grade or less	Some high school	High school diploma	Some college	Bachelors degree	Some graduate school	Masters degree	Doctoral or Professional Degree	Decline to Answer
Demographic	21	Please specify your ethnicity	Select one	N/A	White or Caucasian	Asian / Pacific Islander	Native American or American Indian	Hispanic or Latino	Multi-racial	Decline to Answer	Other (please specify)
Demographic	22	What political party would you consider yourself most aligned with?	Select one	N/A	Not affiliated (independent)	Republican	Democratic	Another party
Demographic	23	Was there any part of the survey you were confused about, or anything about flooding and sea level rise that the survey did not address but should have?	Freeform	N/A	N/A
Demographic	24	Age group breakdown	Select one	N/A	18 to 24	25 to 34	35 to 44	45 to 54	55 to 64	65 and over
Demographic	25	Gender breakdown	Select one	N/A	Female	Male
Demographic	26	Location breakdown	Select one	N/A	CT	DC	DE	FL	MA	MD	ME	NC	NH	NJ	NY	PA	RI	SC	VA

## Sheet: Survey Results
Interview ID	State	Metro Area	Gender	Age	I live in a coastal community	I work in a coastal community	I regularly visit a coastal community	Issues: economy	Issues: preparing for climate change	Issues: reducing taxes	Issues: protecting property from natural disasters	Issues: protecting the environment	Issues: transportation infrastructure	Issues: utilities and related infrastructure	Issues: helping people with limited resources	Issues: protecting against future flooding)	Issues: preparing for sea level rise	Components: educating the community	Components: implementing required policies	Components: developing maps and tools	Components: calculating cost-effective protections	Components: voluntary protections	Components: constructed barriers	Components: postponing Change	Components: preparedness for events	Components: other/write-in	Vulnerability: water surge damage from hurricanes and severe storms	Vulnerability: repeated flooding from high tides	Vulnerability: increased flooding if sea level rises in the future	Vulnerability: other natural disasters	Priorities: drinking Water	Priorities: electric power	Priorities: natural gas / heating fuel	Priorities: sewer / wastewater	Priorities: stormwater and green infrastructure	Priorities: roads and highways	Priorities: public transit	Priorities: places of cultural importance	Priorities: houses of worship	Priorities: homes and residences	Priorities: businesses, offices, shops	Priorities: government facilities	Priorities: parks and public spaces	Priorities: beaches and similar coastal areas	Priorities: natural wetlands, wildlife areas	Priorities: other/write-in	Funding mixture	Funding: no change	Funding: encourage self-pay
1	NY	NEW YORK	male	25 to 34	0	0	1	4	4	5	4	4	4	5	4	5	5	5	5	5	5	5	4	5	4		5	5	5	4	5	5	4	5	4	4	5	4	5	5	5	5	5	5	5		Entirely Private Sector	4	4
2	FL	TAMPA-ST. PETE (SARASOTA)	female	45 to 54	1	0	0	5	1	5	4	3	5	4	2	2	4	2	4	4	5	1	4	4	5		2	1	2	2	4	3	3	3	2	3	3	2	1	3	1	2	3	3	3		Equal Mix of Public and Private Sectors	3	2
3	NY	NEW YORK	male	25 to 34	1	1	1	1	1	1	1	1	1	1	1	1	1	1	1	1	1	1	1	1	1	1 Food and water 2 maps 3 location destination 4 Power source 5 Phone source.	4	3	3	4	1	2	2	2	3	2	1	3	5	2	1	1	2	5	5		Entirely Public Sector	1	1
4	FL	WEST PALM BEACH-FT. PIERCE	female	65 and over	0	0	1	5	5	5	4	5	5	4	4	5	5	4	5	4	4	4	5	2	4		3	2	3	2	5	5	3	4	4	5	3	4	3	5	4	4	3	4	4		Equal Mix of Public and Private Sectors	3	4
5	SC	COLUMBIA, SC	female	65 and over	0	0	1	5	5	5	5	5	5	5	5	5	5	5	5	5	5	5	5	1	5	Educating those who would move to these endangered areas.	5	2	2	5	5	5	3	5	5	5	5	4	5	5	5	4	5	5	5	5 Protecting dam's that have been exceptional vulnerable.	Equal Mix of Public and Private Sectors	2	5
6	MA	BOSTON (MANCHESTER)	male	25 to 34	1	0	1	4	5	5	4	4	4	4	4	4	4	4	4	5	5	4	4	5	5		4	3	3	3	4	5	5	5	5	5	4	5	5	4	5	5	5	5	5		Equal Mix of Public and Private Sectors	5	5
7	NY	NEW YORK	female	45 to 54	1	1	1	5	4	5	4	3	4	3	5	5	3	2	4	3	4	4	5	3	4		4	2	5	4	3	3	5	4	1	4	4	4	4	4	5	3	4	5	5		Mostly Private Sector	4	5
8	FL	WEST PALM BEACH-FT. PIERCE	male	65 and over	1	0	0	5	3	5	5	5	5	5	5	5	3	4	4	4	5	4	3	4	4		2	2	3	3	5	5	2	5	5	5	4	5	5	5	5	5	4	5	4		Equal Mix of Public and Private Sectors	3	3
9	FL	ORLANDO-DAYTONA BCH-MELBRN	female	35 to 44	1	0	0	5	4	5	5	5	5	5	4	5	5	3	3	4	4	3	5	3	5		5	2	4	5	5	5	4	4	4	4	4	4	4	5	4	4	4	5	4		Mostly Public Sector	4	3
10	NJ	NEW YORK	male	18 to 24	1	0	0	5	4	4	4	4	5	5	5	5	4	5	5	4	2	4	5	4	5		4	5	5	4	5	5	4	4	4	5	4	4	4	4	5	5	5	5	4		Mostly Private Sector	5	5
11	NJ	NEW YORK	female	35 to 44	0	0	1	1	1	1	1	1	1	1	1	4	1	1	1	1	1	1	1	1	1	providing info on getting proper flood insurance	2	1	2	2	5	5	5	5	5	5	5	5	5	5	5	5	5	5	5	valuables in home	Entirely Public Sector	1	5
12	MD	WASHINGTON, DC (HAGRSTWN)	male	35 to 44	1	0	0	4	3	3	4	2	4	2	5	5	3	4	3	4	4	4	4	5	5	the basement flooding	4	4	4	5	4	5	2	4	4	4	5	5	3	5	3	5	4	4	5	The library is at 3	Mostly Public Sector	4	3
13	VA		male	35 to 44	1	0	0	3	3	4	3	5	4	4	4	4	4	4	4	3	4	4	3	4	3		4	3	4	5	4	5	4	5	4	4	4	4	4	4	4	5	3	3	5		Mostly Private Sector	5	4
14	PA	PHILADELPHIA	female	55 to 64	0	0	1	1	2	1	1	2	1	1	1	2	2	1	1	1	1	1	1	1	2		2	2	2	2	1	1	1	1	2	2	3	3	3	1	2	1	2	3	3		Mostly Public Sector	3	3
15	NJ	NEW YORK	male	35 to 44	0	1	0	5	5	3	5	5	5	3	5	4	4	3	4	4	5	3	3	5	3	1sign up for flood warnings 2 buy insurance 3flood bags 4get community help 5make a flood plan	4	5	4	3	4	5	5	5	3	2	3	4	3	5	4	3	4	3	5	1hospital 2churches 3areas in low places	Equal Mix of Public and Private Sectors	5	5
16	FL	MIAMI-FT. LAUDERDALE	male	25 to 34	1	0	0	3	2	2	2	3	3	3	2	1	3	1	3	2	2	3	2	3	3	1 is caring about cars and 5 is prepping food.	2	2	1	3	3	3	2	2	3	3	4	3	4	3	4	4	3	3	4	I don't know	Entirely Private Sector	4	3
17	CT	HARTFORD & NEW HAVEN	female	35 to 44	0	0	1	5	5	3	5	4	5	4	4	4	5	5	4	4	4	4	5	5	5		5	5	4	4	5	5	4	5	3	5	4	4	5	5	4	5	4	4	4		Equal Mix of Public and Private Sectors	4	3
18	FL	ORLANDO-DAYTONA BCH-MELBRN	female	18 to 24	1	1	0	5	4	5	5	5	4	5	4	4	5	5	4	5	4	5	4	5	5		5	4	4	5	5	5	4	5	5	5	5	5	5	4	4	5	5	4	5		Entirely Public Sector	4	5
19	NC	GREENSBORO-H.POINT-W.SALEM	male	18 to 24	0	0	1	5	2	3	4	3	5	4	2	4	2	5	3	5	3	4	4	4	4	N/A	5	2	4	3	2	4	4	2	2	3	4	4	3	4	4	4	3	3	1	Marine life 4	Mostly Public Sector	1	4
20	NC	GREENVLL-SPART-ASHEVLL-AND	female	25 to 34	0	0	1	5	5	4	4	5	5	4	5	4	4	5	3	5	5	5	5	4	5		2	1	1	4	5	5	5	5	5	5	4	4	4	5	4	4	3	5	5		Mostly Public Sector	1	4
21	NY	NEW YORK	female	65 and over	1	1	0	5	5	3	5	5	5	5	5	5	5	5	5	5	5	5	5	5	4		4	5	5	4	5	5	5	5	5	5	4	5	5	5	5	5	5	5	4		Equal Mix of Public and Private Sectors	4	4
22	NY	NEW YORK	female	18 to 24	0	0	1	3	5	1	3	5	4	5	4	4	4	5	5	3	2	4	2	4	4		1	1	1	4	5	5	5	3	3	4	4	2	3	3	3	4	2	3	4	Hospitals, nursing homes, animal shelters, 5	Equal Mix of Public and Private Sectors	1	1
23	MA	BOSTON (MANCHESTER)	female	55 to 64	0	0	1	4	4	4	5	5	5	5	4	4	3	4	5	4	4	4	4	4	4		2	2	2	2	4	4	3	4	4	4	4	2	4	4	4	4	2	4	4		Mostly Public Sector	3	4
24	FL	TAMPA-ST. PETE (SARASOTA)	male	35 to 44	1	0	0	5	3	5	5	4	4	5	5	5	4	5	5	5	5	5	5	5	5	I think that the most important thing is awareness. Keep informed when storms are heading toward your geo location	2	1	1	3	5	5	5	5	5	5	5	5	5	5	5	5	5	5	5		Equal Mix of Public and Private Sectors	5	5
25	PA	HARRISBURG-LNCSTR-LEB-YORK	female	35 to 44	0	0	1	5	4	5	5	5	5	5	5	5	4	5	5	5	5	5	5	1	5	figuring out what government aid we could get in case of a severe flood.	4	4	5	4	5	4	4	4	4	4	5	4	3	5	4	4	3	4	3	shelters and schools	Equal Mix of Public and Private Sectors	4	3
26	NC	RALEIGH-DURHAM (FAYETVLLE)	female	55 to 64	1	0	0	3	3	3	5	5	5	5	5	5	4	5	5	5	3	5	5	2	5		4	4	4	4	4	5	1	3	3	5	1	3	3	5	3	5	4	4	4		Equal Mix of Public and Private Sectors	3	2
27	VA		male	25 to 34	0	0	1	5	4	4	4	4	4	5	5	5	4	5	5	5	4	4	5	4	4		4	5	4	5	5	4	5	4	5	4	4	4	4	5	5	5	4	4	5		Mostly Public Sector	4	4
28	NY	NEW YORK	female	65 and over	1	0	1	4	4	4	4	4	4	4	4	4	4	4	4	3	4	4	3	3	3		1	1	2	2	5	4	3	3	3	4	4	3	3	4	4	3	4	3	4		Equal Mix of Public and Private Sectors	2	2
29	VA	GREENSBORO-H.POINT-W.SALEM	male	35 to 44	0	0	1	5	3	5	4	3	3	3	4	3	3	3	3	3	3	4	3	3	4		2	1	1	3	4	4	3	3	1	4	1	2	3	2	3	2	3	2	2		Equal Mix of Public and Private Sectors	1	2
30	NY	NEW YORK	male	65 and over	0	0	1	5	5	5	5	5	5	5	5	4	2	4	4	4	5	4	4	4	4		2	2	2	2	5	5	5	5	5	5	5	4	4	5	5	5	4	2	4		Equal Mix of Public and Private Sectors	1	2
31	MA	BOSTON (MANCHESTER)	female	35 to 44	1	0	0	5	5	5	5	5	5	5	5	5	5	5	5	5	4	5	5	5	5		5	5	5	5	5	4	5	5	5	5	5	5	5	5	5	5	5	5	5		Equal Mix of Public and Private Sectors	1	4
32	FL	TAMPA-ST. PETE (SARASOTA)	female	65 and over	1	0	0	1	1	1	1	1	1	1	1	1	1	5	5	5	5	5	5	5	5		5	5	5	5	5	5	5	5	5	5	5	5	5	5	5	5	5	5	5		Equal Mix of Public and Private Sectors	5	5
33	PA	PHILADELPHIA	female	18 to 24	0	0	1	4	3	4	4	3	5	4	4	4	3	4	4	3	3	3	3	3	4		1	1	3	3	5	5	4	5	4	4	4	4	3	4	4	4	4	4	4		Equal Mix of Public and Private Sectors	1	2
34	VA	NORFOLK-PORTSMTH-NEWPT NWS	male	65 and over	1	0	0	1	1	2	1	1	1	2	1	1	1	1	2	1	2	1	2	3	1		4	1	1	5	5	5	4	5	5	5	4	5	5	4	4	5	5	3	5		Equal Mix of Public and Private Sectors	2	5
35	NJ	NEW YORK	female	45 to 54	1	0	1	5	5	5	5	5	5	5	5	5	5	5	5	5	5	5	5	5	5	insurance know how	5	5	5	5	5	5	5	5	5	5	5	5	5	5	5	5	5	5	5		Mostly Private Sector	5	5
36	SC	SAVANNAH	male	65 and over	1	0	0	4	4	4	4	4	5	5	4	5	4	5	4	4	4	4	4	4	5	evck routes	2	1	2	2	5	5	3	3	4	3	4	2	2	4	3	3	2	4	3	no	Equal Mix of Public and Private Sectors	2	2
37	NY	NEW YORK	female	45 to 54	0	0	1	3	5	5	5	5	5	4	4	5	4	4	4	4	5	5	5	5	5		5	4	4	5	5	4	4	5	4	4	5	2	2	4	3	5	3	3	3		Equal Mix of Public and Private Sectors	4	3
38	CT	HARTFORD & NEW HAVEN	male	25 to 34	0	0	1	4	4	4	4	4	4	4	4	4	4	5	5	5	5	5	5	5	5		4	4	4	4	5	5	5	5	4	5	5	5	3	5	4	5	4	5	5		Equal Mix of Public and Private Sectors	3	4
39	FL	MIAMI-FT. LAUDERDALE	male	25 to 34	0	0	1	1	3	1	3	2	2	3	3	2	2	2	2	2	2	2	3	3	1		1	2	1	1	2	2	3	3	4	3	3	4	2	3	4	3	3	2	3		Entirely Private Sector	3	4
40	NC	GREENVILLE-N.BERN-WASHNGTN	male	35 to 44	1	0	0	3	5	1	5	5	5	5	5	5	5	5	5	5	5	5	4	1	5		5	5	5	5	5	5	5	5	5	5	5	5	1	5	5	5	5	5	5		Entirely Public Sector	1	5
41	FL	ORLANDO-DAYTONA BCH-MELBRN	female	25 to 34	1	0	0	5	5	5	5	5	5	5	5	5	5	2	5	5	5	5	5	2	5		5	4	4	2	5	5	2	5	5	5	5	1	1	5	4	5	2	2	4		Entirely Public Sector	5	2
42	NY	NEW YORK	male	35 to 44	0	0	1	5	4	4	5	4	5	5	4	5	5	5	5	5	4	4	5	5	5		5	4	4	5	4	4	4	4	4	5	4	3	4	4	5	3	4	5	3		Mostly Private Sector	3	4
43	NJ	PHILADELPHIA	male	35 to 44	1	1	1	4	4	4	4	4	5	3	5	5	4	5	4	4	4	5	4	4	5		4	5	4	4	4	5	3	4	4	4	4	4	4	4	4	4	5	4	4		Mostly Private Sector	5	5
44	FL	TAMPA-ST. PETE (SARASOTA)	male	35 to 44	1	0	0	1	1	2	1	1	1	1	1	1	1	5	5	5	5	4	5	5	5		5	5	4	3	4	4	5	5	5	4	4	5	5	5	4	5	5	5	5		Entirely Private Sector	4	5
45	NY	ALBANY-SCHENECTADY-TROY	male	45 to 54	0	0	1	4	4	5	4	5	4	5	4	5	4	4	4	4	4	4	5	5	4		5	4	4	5	4	4	4	4	4	4	4	4	5	4	4	4	5	5	5		Mostly Private Sector	4	4
46	NY	ROCHESTER, NY	male	35 to 44	1	0	0	5	4	4	5	3	4	3	4	5	2	4	4	3	5	4	4	3	4		5	5	4	4	3	3	3	5	4	4	4	4	4	5	3	4	5	4	5		Entirely Private Sector	5	4
47	NC	CHARLOTTE	female	45 to 54	0	0	1	5	4	4	3	5	4	3	4	3	2	4	4	4	5	4	5	2	5		2	1	1	2	5	4	2	5	2	4	2	2	4	4	3	2	2	2	2	Animals shelters	Entirely Public Sector	4	3
48	NJ	NEW YORK	male	35 to 44	0	0	1	5	3	5	5	5	5	5	5	5	4	4	5	5	4	4	5	4	5		3	4	5	4	4	5	4	3	5	4	5	4	5	5	5	4	4	5	4		Equal Mix of Public and Private Sectors	5	2
49	MA	BOSTON (MANCHESTER)	male	55 to 64	1	0	0	4	5	4	5	5	5	4	5	5	5	4	4	4	4	4	4	3	5		3	3	4	2	5	5	4	5	5	4	4	4	2	4	3	4	4	5	4		Mostly Public Sector	1	3
50	NH	BOSTON (MANCHESTER)	female	18 to 24	1	0	0	4	1	1	1	1	1	1	2	1	1	1	1	1	1	1	1	1	1	NONE	1	1	1	1	3	3	3	3	3	3	3	3	3	3	3	3	3	3	3	None	Mostly Public Sector	2	1
51	FL	MIAMI-FT. LAUDERDALE	male	45 to 54	1	0	0	5	5	5	5	5	5	5	5	5	5	5	5	5	5	5	5	5	5		5	5	5	5	5	5	5	5	1	5	1	5	5	5	5	5	5	1	1		Entirely Public Sector	3	3
52	MA	BOSTON (MANCHESTER)	male	35 to 44	0	0	1	4	3	4	4	4	4	2	1	2	4	4	3	3	3	3	2	4	3		2	2	2	3	1	2	2	2	2	3	1	1	1	1	1	1	2	2	1		Mostly Public Sector	4	1
53	FL	TAMPA-ST. PETE (SARASOTA)	male	65 and over	1	0	0	3	3	2	5	5	4	5	4	4	3	3	3	3	4	4	2	2	4		3	1	2	2	5	5	1	4	3	4	2	4	2	4	3	3	3	4	5		Mostly Public Sector	2	4
54	NC	CHARLOTTE	male	25 to 34	0	0	1	5	5	5	5	5	5	5	5	5	5	5	5	5	5	5	4	5	5		5	5	5	5	5	5	5	5	5	5	5	5	5	5	5	5	5	5	5		Entirely Private Sector	5	5
55	MA	SPRINGFIELD-HOLYOKE	female	65 and over	0	0	1	5	5	5	5	5	5	5	5	5	4	5	5	4	5	5	4	4	5		3	3	3	3	5	4	4	4	3	5	4	4	4	4	4	4	4	4	5		Equal Mix of Public and Private Sectors	3	3
56	CT	HARTFORD & NEW HAVEN	female	25 to 34	1	0	0	4	4	5	4	4	4	4	4	4	4	4	3	3	4	4	4	4	4		2	2	2	2	5	5	5	5	4	5	4	5	4	5	4	4	4	4	4		Equal Mix of Public and Private Sectors	4	4
57	NJ	NEW YORK	female	18 to 24	1	0	0	5	5	5	5	5	5	5	5	5	5	5	5	5	5	4	5	5	5		4	1	3	4	5	5	5	4	3	4	5	2	2	4	2	5	3	3	3		Mostly Public Sector	2	4
58	NJ	NEW YORK	female	18 to 24	1	0	0	3	2	3	4	3	4	4	3	3	4	2	3	3	4	2	4	3	3		3	2	3	2	3	3	3	2	2	3	3	1	1	4	3	2	1	3	2		Equal Mix of Public and Private Sectors	2	2
59	VA	RICHMOND-PETERSBURG	male	55 to 64	1	0	0	5	2	3	5	3	5	5	4	5	2	4	5	5	5	4	5	5	5		1	2	2	1	5	5	5	5	5	5	4	3	5	5	5	5	3	3	3		Equal Mix of Public and Private Sectors	4	3
60	FL	MIAMI-FT. LAUDERDALE	male	65 and over	1	0	0	1	5	1	2	4	1	1	2	2	4	4	2	1	3	3	2	2	2		1	1	1	2	2	5	4	3	4	5	1	1	5	4	2	4	2	2	1		Entirely Public Sector	5	1
61	FL	MIAMI-FT. LAUDERDALE	male	25 to 34	1	0	0	3	4	3	3	3	3	3	4	4	3	3	3	4	3	4	3	3	3		3	3	3	3	3	3	3	3	3	3	3	3	3	3	3	3	3	3	3		Equal Mix of Public and Private Sectors	3	3
62	NY	NEW YORK	female	25 to 34	0	0	1	4	5	3	5	5	5	5	4	5	5	5	5	5	3	3	5	3	5		5	4	5	5	5	5	5	5	3	5	3	3	3	5	5	5	5	5	5		Equal Mix of Public and Private Sectors	5	4
63	PA	PHILADELPHIA	male	25 to 34	1	1	1	4	4	4	4	4	4	4	4	5	5	5	4	4	4	4	4	4	5		4	4	5	4	5	5	5	4	4	5	4	5	5	4	4	4	4	5	4		Mostly Private Sector	5	4
64	FL	MIAMI-FT. LAUDERDALE	female	18 to 24	1	0	0	4	5	5	5	5	5	5	5	5	5	4	5	4	5	4	5	3	5		5	5	5	3	5	5	5	4	5	5	5	5	4	5	4	4	5	5	3		Mostly Public Sector	3	3
65	FL	TAMPA-ST. PETE (SARASOTA)	female	65 and over	1	0	0	1	1	2	1	1	1	2	1	1	1	2	2	1	1	1	2	2	1		2	2	2	3	5	4	4	4	4	4	4	4	2	3	3	4	4	4	5		Equal Mix of Public and Private Sectors	1	2
66	NC	RALEIGH-DURHAM (FAYETVLLE)	female	55 to 64	0	0	1	4	5	4	5	4	4	4	5	5	2	5	5	5	4	5	5	3	2		1	1	1	3	5	5	5	5	4	5	4	3	2	5	4	5	4	4	3		Equal Mix of Public and Private Sectors	3	2
67	VA	ROANOKE-LYNCHBURG	female	25 to 34	0	0	1	5	5	5	5	5	5	5	5	5	5	5	5	5	5	5	5	5	5		3	2	2	2	5	5	5	5	5	5	5	5	5	5	5	5	5	5	5		Equal Mix of Public and Private Sectors	5	5
68	FL	TAMPA-ST. PETE (SARASOTA)	male	35 to 44	1	0	0	3	4	1	1	4	4	5	5	5	4	3	5	5	5	3	4	1	5		2	1	3	1	5	5	4	5	3	5	5	3	1	4	3	5	3	2	3		Equal Mix of Public and Private Sectors	3	5
69	SC	CHARLESTON, SC	female	45 to 54	0	0	1	1	2	2	1	1	2	1	1	1	1	1	1	2	1	2	1	2	1	5 would be to stop building where it is already an issue.	5	4	5	3	5	5	4	5	4	4	5	3	3	5	3	5	3	4	4	5 schools	Equal Mix of Public and Private Sectors	3	1
70	MA	BOSTON (MANCHESTER)	female	18 to 24	1	0	0	4	4	2	5	5	4	5	4	5	5	5	5	5	5	4	5	1	5	Public awareness 5 Science behind climate change 5	3	3	4	2	5	5	3	4	3	3	2	2	1	4	1	3	3	4	5	Community centers 3	Mostly Public Sector	2	4
71	NY	NEW YORK	female	18 to 24	0	1	1	4	3	4	3	4	4	4	3	4	4	4	5	4	3	5	4	4	4		3	3	4	4	4	4	4	5	4	3	5	5	5	4	4	5	4	5	4		Mostly Private Sector	5	5
72	SC	MYRTLE BEACH-FLORENCE	female	65 and over	1	0	0	5	5	5	5	5	5	5	5	5	5	5	5	5	5	5	5	5	5		5	5	5	5	5	5	5	5	5	5	5	5	5	5	5	5	4	5	5		Equal Mix of Public and Private Sectors	1	5
73	VA	NORFOLK-PORTSMTH-NEWPT NWS	male	55 to 64	1	1	0	5	4	5	4	5	5	4	5	5	5	4	5	4	5	4	5	5	5		3	3	3	2	4	3	4	4	3	4	4	4	4	4	4	4	4	3	3		Equal Mix of Public and Private Sectors	3	4
74	PA	WILKES BARRE-SCRANTON-HZTN	female	25 to 34	0	0	1	4	5	4	4	4	4	4	5	5	4	4	4	4	4	5	4	4	4		4	4	4	4	3	4	4	5	4	4	3	4	5	4	4	4	5	4	5		Equal Mix of Public and Private Sectors	4	4
75	NY	NEW YORK	female	18 to 24	1	0	0	1	1	1	1	1	1	2	1	1	1	2	1	1	1	1	1	1	1		5	4	5	3	5	5	5	3	5	5	5	4	3	5	3	4	4	5	4		Equal Mix of Public and Private Sectors	2	1
76	PA	WILKES BARRE-SCRANTON-HZTN	female	18 to 24	1	0	0	3	4	2	5	4	4	3	3	5	4	4	3	4	3	3	4	2	4		3	2	2	3	4	2	3	2	3	3	3	2	2	4	2	3	1	1	2		Mostly Public Sector	1	4
77	FL	TAMPA-ST. PETE (SARASOTA)	female	35 to 44	0	0	1	3	3	3	3	3	3	3	3	3	3	3	3	3	3	3	3	3	3		2	2	1	1	2	2	1	1	1	1	1	2	1	2	2	2	2	1	1		Equal Mix of Public and Private Sectors	2	2
78	FL	TAMPA-ST. PETE (SARASOTA)	female	65 and over	1	0	0	3	1	5	4	3	4	4	4	5	4	3	3	3	2	2	4	2	4		2	1	1	2	5	5	2	5	1	4	1	3	5	5	3	4	2	3	2		Equal Mix of Public and Private Sectors	2	2
79	NJ	NEW YORK	female	55 to 64	1	0	0	5	4	5	5	5	5	5	4	5	5	5	5	5	5	5	5	5	5		3	3	3	2	5	5	5	5	4	5	4	3	3	5	4	5	4	4	3		Equal Mix of Public and Private Sectors	3	3
80	VA	NORFOLK-PORTSMTH-NEWPT NWS	female	25 to 34	1	0	1	5	4	5	4	5	4	4	5	5	4	4	5	3	5	4	4	3	4		4	3	4	3	2	3	3	3	3	3	3	3	3	3	3	3	3	3	2		Mostly Public Sector	3	4
81	NY	NEW YORK	female	55 to 64	0	0	1	3	4	5	3	5	4	4	2	4	2	2	4	4	1	1	1	1	2		2	1	1	2	2	2	1	2	2	3	1	1	1	2	2	1	1	1	2	5 Reservoirs	Equal Mix of Public and Private Sectors	3	3
82	NY	NEW YORK	female	45 to 54	0	0	1	4	5	5	5	5	5	4	5	5	5	4	5	4	5	5	4	5	4	Yes. Animal life and sea walls	5	5	4	4	4	4	5	4	4	4	5	5	4	4	3	4	4	4	4		Mostly Private Sector	4	4
83	DC	WASHINGTON, DC (HAGRSTWN)	female	25 to 34	0	0	1	4	5	1	5	5	5	5	4	5	5	5	5	5	4	5	5	1	5	Persuasion campaigns within coastal communities has been very effective, conveying the impacts of sea level rise to non-coastal communities is the national barrier to policy changes. 5	5	5	5	2	5	4	4	5	5	5	5	4	3	3	3	5	2	5	4		Equal Mix of Public and Private Sectors	1	1
84	FL	WEST PALM BEACH-FT. PIERCE	male	35 to 44	0	0	1	1	1	1	1	1	1	1	1	1	1	1	1	1	1	1	1	1	1	1. call family 2. have food 3. have water 4. have insurance 5. have prayer	2	2	2	2	3	3	2	2	2	4	3	3	2	2	3	2	3	2	4	1. raft 2. goggles 3. plane ticket 4. health insurance 5. batteries	Entirely Private Sector	3	2
85	VA	NORFOLK-PORTSMTH-NEWPT NWS	female	35 to 44	1	1	0	3	5	4	4	4	4	4	5	4	5	4	4	4	4	4	4	2	4	sea level rise will eventually impact people living at the water	4	4	3	3	5	5	4	3	3	2	3	3	3	1	4	4	2	2	3		Mostly Public Sector	5	5
86	SC	GREENVLL-SPART-ASHEVLL-AND	female	45 to 54	0	0	1	5	4	5	5	4	5	4	4	5	4	5	5	5	4	4	5	4	5		3	3	3	3	5	5	5	5	4	5	5	5	5	5	5	5	4	5	4		Equal Mix of Public and Private Sectors	3	4
87	FL	ORLANDO-DAYTONA BCH-MELBRN	male	55 to 64	0	1	0	5	5	4	5	5	5	5	4	4	1	3	4	4	4	4	5	3	4	Better drainage	5	2	2	4	5	5	5	5	4	5	5	4	3	4	4	5	3	4	5		Equal Mix of Public and Private Sectors	3	4
88	FL	JACKSONVILLE	female	18 to 24	0	0	1	2	5	3	3	5	3	3	5	5	2	4	3	4	5	4	3	4	4		4	5	4	3	3	3	1	5	2	4	3	3	4	2	2	4	2	4	4		Mostly Public Sector	4	2
89	FL	MIAMI-FT. LAUDERDALE	male	45 to 54	1	0	0	5	3	4	5	5	5	5	2	4	5	4	3	5	4	4	5	5	5		5	4	5	3	4	5	3	2	4	4	2	4	1	3	3	4	2	5	5		Mostly Public Sector	3	1
90	VA	ROANOKE-LYNCHBURG	female	25 to 34	0	1	0	4	1	4	4	4	3	3	4	5	4	4	4	3	4	5	5	4	4	NOT SURE	3	2	2	2	3	3	3	2	4	5	5	2	1	5	4	4	4	4	4	NOT SURE	Mostly Private Sector	3	4
91	NY	NEW YORK	male	35 to 44	1	0	0	2	2	3	2	2	2	2	2	3	3	3	2	2	3	2	2	3	2		2	2	2	1	4	5	4	4	3	5	5	4	4	5	4	4	2	4	5		Equal Mix of Public and Private Sectors	3	2
92	VA	WASHINGTON, DC (HAGRSTWN)	female	35 to 44	0	0	1	4	2	4	5	4	4	4	4	5	4	5	5	4	5	5	4	2	5	1. Making people understand that coastal communities will flood regardless of human intervention. 2. Building homes further away from coast and higher up.	5	5	4	2	5	4	5	5	3	3	4	4	4	4	4	5	2	2	2		Equal Mix of Public and Private Sectors	2	5
93	NC	GREENSBORO-H.POINT-W.SALEM	male	45 to 54	0	0	1	3	3	5	5	4	5	5	5	4	4	4	5	4	5	5	4	2	5	1. Studying environment 2. Come up with a plan 3. Evaluate all plans 4. Educate and choose plans. 5. Evaluate plans	3	2	3	5	5	5	5	5	4	5	5	2	5	5	3	4	3	5	3		Equal Mix of Public and Private Sectors	3	5
94	NC	RALEIGH-DURHAM (FAYETVLLE)	male	18 to 24	0	0	1	5	3	4	4	4	5	4	2	3	3	2	3	3	2	3	1	1	3		1	1	2	3	5	5	4	4	4	4	3	4	3	5	3	5	5	2	4		Mostly Public Sector	1	2
95	NC	CHARLOTTE	female	35 to 44	0	0	1	3	3	3	5	5	4	2	2	4	2	5	5	4	4	3	5	2	3		5	2	3	4	4	5	5	2	4	4	3	3	5	5	2	4	3	4	1		Equal Mix of Public and Private Sectors	3	3
96	PA	PHILADELPHIA	female	45 to 54	0	0	1	2	4	4	4	3	2	4	2	4	3	3	3	3	5	5	5	2	4		3	2	1	2	2	2	4	1	4	3	2	3	2	3	3	3	2	2	2		Mostly Private Sector	3	2
97	MA	PROVIDENCE-NEW BEDFORD	female	45 to 54	1	0	0	4	4	4	4	5	5	5	4	5	5	4	5	5	5	4	5	4	5		4	3	3	4	5	5	5	5	4	5	4	4	4	5	4	4	4	4	4		Equal Mix of Public and Private Sectors	4	4
98	NJ	PHILADELPHIA	male	18 to 24	0	0	1	2	4	3	3	3	1	3	4	3	4	5	5	2	2	5	4	2	3	For preparing for future flooding and sea level rise, the community is attempting to build more buildings nearby with material to withstand rough weather, especially flooding.	3	3	3	2	3	3	4	3	3	3	3	3	3	5	4	4	5	5	1		Equal Mix of Public and Private Sectors	3	4
99	FL	WEST PALM BEACH-FT. PIERCE	female	65 and over	1	0	0	4	2	2	3	4	5	4	3	4	2	2	3	4	4	3	4	3	4		4	3	4	3	4	5	4	4	3	4	3	3	4	4	3	3	3	4	3		Equal Mix of Public and Private Sectors	2	2
10	NY	NEW YORK	female	18 to 24	1	0	0	5	3	4	3	4	3	3	3	4	4	2	3	3	3	2	3	4	3		4	2	4	2	4	5	3	4	3	3	5	3	1	4	5	3	2	3	1		Mostly Public Sector	4	2
101	FL	WEST PALM BEACH-FT. PIERCE	male	45 to 54	1	1	1	4	4	3	5	5	5	5	4	5	4	3	4	5	4	4	5	3	5		4	3	3	4	5	5	4	3	4	4	2	3	3	5	4	3	3	4	4		Mostly Public Sector	4	3
102	PA	PHILADELPHIA	female	45 to 54	1	1	0	4	4	4	4	4	4	4	4	4	4	5	5	5	5	5	5	5	5		1	2	2	1	4	4	4	4	4	4	4	4	4	4	4	4	4	4	4		Equal Mix of Public and Private Sectors	4	4
103	NY	NEW YORK	male	25 to 34	1	0	0	5	1	5	5	1	4	4	5	4	2	3	4	5	5	3	5	3	5	Elevating homes in low-lying areas and requiring new buildings be elevated with staircases to reach the first floor.	4	1	2	2	5	5	5	5	3	5	5	5	5	5	5	1	3	4	2		Equal Mix of Public and Private Sectors	1	5
104	NY	NEW YORK	female	25 to 34	0	0	1	4	5	4	5	5	5	5	5	5	5	5	5	4	5	3	4	3	5		5	5	5	3	5	5	5	4	5	5	5	4	4	4	4	4	4	5	5		Equal Mix of Public and Private Sectors	1	1
105	NJ	NEW YORK	female	18 to 24	0	0	1	5	4	5	3	5	4	5	4	4	3	3	3	3	3	4	3	3	3		2	2	1	3	4	5	5	5	5	5	5	5	5	5	3	5	3	5	5		Equal Mix of Public and Private Sectors	3	1
106	NJ	PHILADELPHIA	female	25 to 34	1	0	0	1	1	1	1	1	1	1	1	1	1	1	1	1	1	1	1	1	1	help get people ready 5	5	5	5	5	5	5	5	5	5	5	5	5	5	5	5	5	5	5	5		Entirely Public Sector	5	5
107	PA	HARRISBURG-LNCSTR-LEB-YORK	male	55 to 64	1	0	0	5	4	5	5	4	5	5	5	5	4	5	5	5	5	5	5	5	5	None	2	2	2	3	5	5	4	5	4	5	5	4	4	5	5	4	4	4	4		Equal Mix of Public and Private Sectors	4	4
108	NY	NEW YORK	female	35 to 44	0	0	1	5	5	5	5	5	5	5	5	5	5	5	5	5	5	5	5	5	5		5	5	5	4	4	5	4	4	4	4	5	4	5	5	5	5	5	5	5		Equal Mix of Public and Private Sectors	4	4
109	MD	BALTIMORE	female	55 to 64	1	0	0	4	3	4	4	4	5	4	5	4	4	4	4	4	4	4	5	4	5		4	3	3	2	4	5	5	4	4	5	5	2	3	5	4	4	4	4	4		Equal Mix of Public and Private Sectors	3	2
110	PA	PITTSBURGH	female	25 to 34	0	1	0	5	5	5	5	5	5	5	5	5	5	5	5	5	5	5	5	5	5	to get the supplys	5	5	5	5	5	5	5	5	5	5	5	5	5	5	5	5	5	5	5		Mostly Private Sector	5	5
111	MA	ALBANY-SCHENECTADY-TROY	male	45 to 54	0	0	1	4	4	4	4	4	4	4	5	5	5	5	5	4	5	4	4	3	5	Staying informed about future wheather conditions. Seeing if need to travel away from the beach!	5	5	3	3	5	5	4	4	3	4	4	2	3	5	3	3	3	5	3		Equal Mix of Public and Private Sectors	4	5
112	FL	ORLANDO-DAYTONA BCH-MELBRN	male	35 to 44	1	0	0	5	5	5	5	5	5	5	5	5	5	5	5	5	5	5	5	5	5	Food preparation incase of emergencies.	5	4	5	5	5	5	5	5	5	5	4	4	4	5	5	4	5	5	5	Neighbors	Equal Mix of Public and Private Sectors	3	5
113	NC	CHARLOTTE	male	35 to 44	0	0	1	5	5	5	5	5	5	5	5	5	4	5	5	4	5	5	4	5	5		4	4	4	4	5	5	5	5	5	5	5	4	4	5	5	4	5	5	5		Mostly Private Sector	3	4
114	NH	BOSTON (MANCHESTER)	female	18 to 24	1	0	0	5	5	4	5	5	5	5	5	5	5	5	5	5	5	5	5	5	5		2	2	3	3	5	5	5	5	5	5	5	5	5	5	5	5	5	5	5		Entirely Public Sector	5	5
115	FL	TAMPA-ST. PETE (SARASOTA)	male	45 to 54	1	1	1	5	5	4	5	5	4	5	5	5	5	4	5	4	4	4	5	2	5	Educating the citizens who are in flood zones on ways to protect their homes and evacuate if necessary	5	4	4	3	4	4	2	4	4	5	3	3	4	4	4	4	4	4	5		Equal Mix of Public and Private Sectors	3	4
116	SC	COLUMBIA, SC	female	25 to 34	0	0	1	1	1	1	1	1	1	1	1	1	1	1	1	1	1	1	1	1	1		2	2	2	2	4	4	4	4	2	4	4	2	4	4	4	4	2	4	4		Mostly Public Sector	1	3
117	NY	NEW YORK	female	45 to 54	1	0	0	5	5	5	5	5	5	5	5	5	5	5	5	5	5	5	5	5	5		4	5	3	5	5	5	5	5	5	5	5	5	5	5	5	5	5	5	5		Mostly Public Sector	5	3
118	NY	NEW YORK	male	35 to 44	0	1	0	1	1	1	1	1	1	1	1	1	1	5	5	5	3	4	5	3	5		3	4	4	4	5	4	4	5	3	4	3	4	5	4	3	3	5	4	4		Mostly Public Sector	4	3
119	SC	GREENVLL-SPART-ASHEVLL-AND	male	55 to 64	0	0	1	1	1	1	1	1	1	1	1	1	1	1	1	1	1	1	1	1	1		1	1	1	1	5	5	5	5	5	5	5	5	5	5	5	5	5	5	5		Equal Mix of Public and Private Sectors	5	5
120	NC	RALEIGH-DURHAM (FAYETVLLE)	female	45 to 54	0	0	1	4	4	3	5	4	5	4	4	5	5	4	5	5	4	4	1	2	5		4	3	3	2	5	4	4	5	4	5	5	5	4	5	5	5	4	4	4		Equal Mix of Public and Private Sectors	5	2
121	FL	WEST PALM BEACH-FT. PIERCE	female	45 to 54	1	0	0	5	3	1	5	5	4	4	5	3	3	3	3	5	3	5	5	3	5	1 there is none 5 there is constant threat of flooding in our area especially during a hurricane	5	2	5	5	4	4	4	4	4	4	4	4	4	4	4	4	4	4	4		Equal Mix of Public and Private Sectors	1	1
122	NC	RALEIGH-DURHAM (FAYETVLLE)	female	25 to 34	0	0	1	5	5	5	5	5	5	5	5	5	5	5	5	4	3	5	4	1	5		2	2	2	4	5	5	4	4	3	5	4	4	4	5	4	4	4	4	4		Mostly Public Sector	4	5
123	PA	PITTSBURGH	female	35 to 44	0	0	1	1	1	1	1	1	1	1	1	1	1	5	5	5	5	5	5	5	5		3	3	3	3	5	5	5	5	5	5	4	5	5	5	5	5	5	4	5		Equal Mix of Public and Private Sectors	4	3
124	VA	RICHMOND-PETERSBURG	female	25 to 34	0	0	1	5	5	5	5	5	5	5	5	5	5	5	5	5	5	5	5	4	5		5	5	5	5	5	5	3	5	5	4	5	3	4	4	3	5	3	4	4		Equal Mix of Public and Private Sectors	5	5
125	FL	TAMPA-ST. PETE (SARASOTA)	female	55 to 64	0	0	1	4	3	4	5	3	5	5	4	3	2	2	2	2	1	2	1	2	2		1	1	1	5	5	5	4	5	3	3	4	4	3	4	3	4	2	3	3		Equal Mix of Public and Private Sectors	5	3
126	NY	NEW YORK	male	25 to 34	0	1	0	4	5	5	5	5	4	5	5	4	4	5	5	4	4	5	4	4	5		3	4	3	3	4	4	3	3	4	4	4	4	3	3	4	3	4	3	3		Entirely Public Sector	4	4
127	FL	MIAMI-FT. LAUDERDALE	male	25 to 34	1	0	0	5	5	5	5	5	5	5	5	5	4	5	5	5	5	5	5	5	5		4	1	4	3	5	5	4	3	4	4	5	4	1	4	4	4	3	3	5		Entirely Public Sector	4	5
128	VA	HARRISONBURG	female	35 to 44	0	1	1	5	5	5	5	5	5	5	5	5	5	5	5	5	4	5	5	5	5		5	4	4	4	5	5	5	5	5	5	4	5	3	5	5	5	5	4	5		Entirely Public Sector	5	5
129	FL	JACKSONVILLE	male	55 to 64	1	1	0	5	4	4	4	5	5	4	4	4	5	5	5	4	4	4	4	5	4		4	5	4	4	4	5	4	5	4	5	4	4	4	4	4	4	5	5	5		Equal Mix of Public and Private Sectors	5	4
130	NH	BOSTON (MANCHESTER)	male	65 and over	0	0	1	2	1	4	1	1	4	3	4	2	1	3	1	2	2	3	1	2	2		1	1	1	2	5	4	2	3	2	3	1	3	2	4	2	3	4	5	1		Entirely Public Sector	2	3
131	NY	NEW YORK	male	25 to 34	1	0	0	4	5	4	4	5	5	4	3	5	4	4	4	3	3	3	3	3	3		4	3	3	3	4	5	3	3	3	4	5	3	3	4	3	4	3	3	3		Mostly Public Sector	4	3
132	NJ	NEW YORK	female	45 to 54	1	1	1	5	5	5	5	5	5	5	5	5	5	4	5	5	5	4	5	1	5		5	5	5	4	5	4	3	4	4	5	3	3	3	5	4	5	4	5	5		Mostly Public Sector	1	2
133	NC	GREENVLL-SPART-ASHEVLL-AND	female	25 to 34	0	0	1	4	4	2	5	5	4	4	5	4	5	4	5	5	4	4	4	4	5		5	4	4	3	5	4	4	5	3	3	4	4	4	4	4	4	5	3	4		Mostly Public Sector	4	4
134	FL	JACKSONVILLE	female	45 to 54	1	1	0	4	5	4	5	5	4	5	4	5	4	3	5	4	4	4	4	2	5		3	4	2	2	4	4	4	4	3	4	4	3	4	3	4	4	3	1	2		Equal Mix of Public and Private Sectors	3	3
135	VA	HARRISONBURG	female	35 to 44	0	0	1	4	5	5	5	5	5	5	5	5	2	5	5	4	5	5	4	2	4		2	4	4	5	5	5	5	4	5	5	5	5	4	5	5	4	3	3	4		Mostly Public Sector	4	5
136	FL	TAMPA-ST. PETE (SARASOTA)	female	65 and over	1	0	0	5	3	4	3	4	3	3	5	4	3	3	3	3	3	3	3	1	4		2	2	2	2	5	5	3	5	2	3	1	1	1	1	1	3	1	2	2		Mostly Private Sector	3	2
137	CT	HARTFORD & NEW HAVEN	male	25 to 34	0	0	1	3	4	2	3	5	5	5	4	3	4	3	4	3	3	4	4	4	4		3	3	2	2	4	3	3	2	3	3	3	3	4	3	3	2	4	4	4		Equal Mix of Public and Private Sectors	2	3
138	NH	BOSTON (MANCHESTER)	female	25 to 34	0	0	1	4	3	4	3	5	5	4	5	5	4	5	5	5	4	4	4	3	5		3	2	3	2	4	4	4	3	4	4	2	3	2	4	3	5	2	4	3		Mostly Public Sector	1	3
139	NY	NEW YORK	male	25 to 34	1	0	0	3	3	3	3	3	3	3	4	3	3	4	4	4	4	4	4	4	4		2	2	2	3	5	3	5	3	3	3	4	3	2	3	3	3	3	3	2		Equal Mix of Public and Private Sectors	3	2
140	NC	GREENVILLE-N.BERN-WASHNGTN	female	55 to 64	1	0	0	1	2	2	2	2	1	2	1	2	2	1	1	1	1	2	1	1	1		3	3	3	3	4	4	4	3	3	4	4	3	3	4	3	3	3	3	3		Equal Mix of Public and Private Sectors	2	2
141	NC	CHARLOTTE	female	25 to 34	0	0	1	5	5	4	5	5	5	5	5	5	5	5	5	5	5	5	5	2	5		5	4	5	5	5	5	5	4	2	5	4	4	5	5	4	4	5	3	5		Equal Mix of Public and Private Sectors	5	2
142	NC	RALEIGH-DURHAM (FAYETVLLE)	male	55 to 64	0	0	1	5	4	4	3	4	4	4	3	3	2	3	4	4	3	4	2	4	4		3	2	4	3	4	4	4	4	3	4	3	3	3	3	2	3	3	4	3		Equal Mix of Public and Private Sectors	2	4
143	NJ	NEW YORK	female	35 to 44	1	1	0	4	5	4	4	4	4	4	5	4	4	4	5	3	4	5	4	4	3		3	3	3	4	4	4	4	4	5	3	3	4	2	3	4	5	5	5	4		Mostly Public Sector	4	2
144	NY	NEW YORK	female	65 and over	0	0	1	5	5	5	5	5	5	5	5	5	5	5	5	5	5	5	5	2	5		4	3	4	3	5	5	4	5	5	5	5	5	4	5	5	5	5	5	5		Equal Mix of Public and Private Sectors	3	5
145	FL	MIAMI-FT. LAUDERDALE	female	45 to 54	1	0	0	5	5	5	5	5	5	5	5	5	5	5	5	5	5	5	5	5	5		4	4	4	4	4	5	5	5	5	5	5	5	5	5	5	5	5	5	5		Equal Mix of Public and Private Sectors	4	3
146	NJ	PHILADELPHIA	female	25 to 34	0	1	1	5	4	5	5	5	4	4	5	4	4	5	5	5	4	5	4	4	4		4	5	4	4	5	5	4	4	5	4	4	5	3	5	5	3	5	4	4		Mostly Public Sector	3	2
147	MA	BOSTON (MANCHESTER)	male	35 to 44	1	0	0	1	1	1	1	1	1	1	1	1	2	1	1	1	1	1	1	1	1		1	1	1	2	4	4	4	2	4	4	4	1	2	4	2	4	2	4	4	Animal shelter	Equal Mix of Public and Private Sectors	1	2
148	NY	NEW YORK	female	25 to 34	1	0	0	5	5	5	4	5	4	5	5	5	4	5	5	5	5	5	5	5	5		5	5	5	5	4	5	5	4	4	4	4	5	4	5	5	5	5	4	5		Equal Mix of Public and Private Sectors	5	5
149	FL	MIAMI-FT. LAUDERDALE	male	65 and over	1	0	0	4	5	4	5	5	5	5	5	5	5	5	4	4	5	4	5	4	5		3	3	3	3	5	5	4	5	4	5	4	4	3	5	5	5	4	4	5		Equal Mix of Public and Private Sectors	4	5
150	NY	NEW YORK	female	65 and over	0	0	1	1	1	1	1	1	1	1	2	1	1	2	1	1	1	2	1	2	1		3	2	2	1	3	4	3	2	2	4	1	2	2	3	4	4	2	2	2	Schools	Equal Mix of Public and Private Sectors	1	1
151	FL	ORLANDO-DAYTONA BCH-MELBRN	female	45 to 54	0	0	1	3	4	3	5	4	4	5	3	4	4	4	3	4	3	4	4	2	5	no longer Rebuilding in flood zones 1	5	3	5	5	5	5	5	4	3	4	4	3	1	4	1	4	2	5	3		Equal Mix of Public and Private Sectors	2	4
152	NY	NEW YORK	female	65 and over	1	0	0	3	4	4	4	4	4	4	3	5	4	5	5	5	5	5	5	3	5		4	3	4	2	5	5	5	5	4	5	5	4	4	4	3	5	3	4	3		Equal Mix of Public and Private Sectors	3	4
153	PA	ERIE	female	55 to 64	1	0	0	5	5	4	2	5	5	4	4	5	2	5	5	5	5	5	5	4	4		1	3	3	3	4	5	4	4	4	4	4	4	4	4	3	3	3	4	2		Mostly Public Sector	3	4
154	MA	BOSTON (MANCHESTER)	male	45 to 54	1	1	0	5	5	1	5	5	5	5	5	5	5	5	5	5	4	5	4	1	5		5	4	5	2	5	5	5	4	5	5	5	5	5	5	5	5	5	5	4		Equal Mix of Public and Private Sectors	1	5
155	MA	BOSTON (MANCHESTER)	male	35 to 44	0	0	1	1	1	2	1	1	1	1	2	1	1	1	1	1	1	1	1	1	1	N/A	3	2	2	4	5	4	5	5	4	5	4	3	4	4	3	5	4	5	4	Public shelter	Mostly Public Sector	2	4
156	MD	BALTIMORE	male	25 to 34	1	0	0	3	4	2	5	3	4	4	4	3	4	4	4	3	5	3	4	3	4		3	5	4	4	2	5	5	4	2	4	3	3	5	3	4	4	3	5	4		Mostly Public Sector	5	4
157	NC	CHARLOTTE	female	45 to 54	0	0	1	5	5	5	5	5	5	5	5	5	5	5	5	5	5	5	5	5	5		3	3	3	4	5	5	5	5	5	5	4	4	2	5	3	5	3	4	5		Equal Mix of Public and Private Sectors	4	4
158	PA	PITTSBURGH	female	18 to 24	0	0	1	3	4	4	4	4	4	5	5	4	4	4	4	3	4	4	5	4	3	Evacuation policies. Rate:5	4	4	4	4	4	3	4	5	4	4	4	4	3	5	4	4	3	3	5	Boat docks. Rate:4	Entirely Public Sector	2	4
159	NY	NEW YORK	male	18 to 24	1	0	0	5	5	5	5	5	5	5	5	5	5	4	5	5	5	5	5	5	5		4	5	5	4	5	5	5	5	5	5	5	5	5	5	5	5	5	5	5		Entirely Public Sector	1	2
160	MD	BALTIMORE	female	18 to 24	1	0	0	5	3	5	3	5	3	3	4	4	4	4	4	4	5	5	4	3	5		4	4	5	4	5	4	4	4	3	3	5	3	3	4	5	3	3	4	4		Equal Mix of Public and Private Sectors	5	1
161	CT	HARTFORD & NEW HAVEN	male	18 to 24	1	0	0	4	4	3	4	4	3	4	3	3	4	4	4	4	3	4	4	4	4		3	4	3	3	3	3	3	3	3	3	4	3	4	2	3	3	3	2	3		Equal Mix of Public and Private Sectors	3	3
162	NC	GREENVLL-SPART-ASHEVLL-AND	male	65 and over	0	0	1	4	1	4	2	3	4	4	2	2	1	2	2	2	2	2	1	2	2		1	1	2	2	1	2	2	2	1	2	1	1	1	1	2	1	1	1	1		Equal Mix of Public and Private Sectors	2	1
163	NY	NEW YORK	male	35 to 44	1	0	0	5	5	4	5	5	5	4	5	5	5	5	5	5	5	4	5	1	5		4	4	4	4	5	5	4	3	4	5	4	4	5	5	5	5	5	4	4		Equal Mix of Public and Private Sectors	4	2
164	CT	HARTFORD & NEW HAVEN	male	18 to 24	0	0	1	4	4	4	3	4	4	5	3	3	3	3	3	2	4	3	2	4	3		1	1	1	2	2	4	2	2	3	3	1	2	2	2	2	2	3	2	2	Town electric supply	Equal Mix of Public and Private Sectors	4	4
165	MD	BALTIMORE	male	35 to 44	0	0	1	5	5	5	5	5	5	5	5	5	5	5	5	5	5	5	5	5	5	don't know	2	2	2	3	5	4	5	1	5	4	5	5	5	5	5	1	5	5	5	no	Mostly Private Sector	5	1
166	FL	MIAMI-FT. LAUDERDALE	male	35 to 44	1	0	0	4	4	4	4	5	5	5	4	4	4	4	5	4	5	4	4	4	5		5	2	5	4	5	4	3	5	5	4	3	1	2	5	4	4	2	4	4		Equal Mix of Public and Private Sectors	3	5
167	MA	BOSTON (MANCHESTER)	female	35 to 44	0	0	1	4	4	3	4	5	5	5	5	3	4	3	3	4	3	4	2	2	4	relocating hazardous materials 3	1	2	3	3	4	4	3	3	3	4	5	5	1	5	5	4	2	3	3	N/A	Mostly Public Sector	2	4
168	FL	TAMPA-ST. PETE (SARASOTA)	female	65 and over	1	0	0	4	4	3	4	5	5	5	4	5	4	4	4	4	5	4	3	3	4		4	3	4	4	5	5	4	5	4	4	4	4	3	5	5	5	4	3	4		Mostly Public Sector	2	3
169	NY	UTICA	male	25 to 34	1	0	1	5	4	4	3	4	4	4	3	4	3	4	5	5	4	4	5	5	3	nope	3	4	3	4	4	4	4	3	5	5	4	4	5	4	4	3	3	4	4	no	Equal Mix of Public and Private Sectors	4	4
170	NC	CHARLOTTE	female	18 to 24	1	0	0	3	5	3	4	4	4	5	3	4	4	4	5	4	4	5	3	5	4		4	4	3	3	4	3	5	5	4	4	3	5	4	3	3	4	3	5	2	emergency assistance availability	Entirely Private Sector	4	3
171	NY	NEW YORK	female	18 to 24	1	1	0	5	3	4	4	3	3	5	4	4	5	4	5	4	4	5	5	5	4		3	3	4	3	3	3	4	3	3	4	3	3	3	3	3	3	3	3	4		Mostly Public Sector	3	3
172	NY	NEW YORK	female	55 to 64	1	0	0	4	4	4	4	4	4	4	4	4	4	5	4	5	4	5	3	4	5		4	4	4	1	5	4	4	4	3	4	4	3	4	4	3	4	3	3	4		Equal Mix of Public and Private Sectors	4	5
173	NY	NEW YORK	male	25 to 34	0	0	1	4	5	2	5	4	5	4	4	5	5	5	4	5	3	5	5	3	5		3	2	3	2	4	5	5	5	4	5	5	3	1	5	5	5	5	4	5		Mostly Public Sector	1	3
174	MA	BOSTON (MANCHESTER)	female	25 to 34	1	0	0	4	3	4	3	3	4	3	4	3	2	3	2	4	2	3	3	3	3	n/a	2	2	2	2	3	3	3	2	3	3	3	3	3	2	1	2	3	3	2	n/a	Equal Mix of Public and Private Sectors	3	3
175	NY	NEW YORK	male	65 and over	1	0	0	5	5	4	5	4	4	4	4	4	4	4	4	4	5	3	2	2	3	Informing citizens of safe havens during a natural disaster. Putting up barriers to prevent flooding in low areas Creating response teams to be activated whenever needed	3	1	3	2	5	4	4	4	2	3	4	3	3	4	3	5	2	2	1		Equal Mix of Public and Private Sectors	2	2
176	MA	PROVIDENCE-NEW BEDFORD	male	65 and over	0	0	1	4	4	3	4	4	3	4	3	4	4	3	4	3	3	3	5	3	4		4	2	4	2	3	3	3	3	3	4	3	3	3	4	3	3	3	4	3		Mostly Public Sector	2	1
177	CT	HARTFORD & NEW HAVEN	female	18 to 24	0	0	1	5	5	5	5	5	5	5	5	5	5	5	5	5	5	5	5	5	5		3	3	3	4	5	5	5	5	5	5	5	5	5	5	5	4	5	5	5		Equal Mix of Public and Private Sectors	5	5
178	FL	MOBILE-PENSACOLA (FT WALT)	male	55 to 64	1	1	0	5	5	3	5	5	5	5	4	4	5	5	4	5	5	4	4	4	5		2	2	2	3	5	4	4	3	4	4	3	3	3	4	3	5	4	3	4		Mostly Public Sector	3	2
179	NY	SYRACUSE	female	18 to 24	0	0	1	2	5	4	5	5	5	5	5	5	5	5	5	5	5	5	5	5	5	1. Education 2. Impeach Trump	1	1	1	4	5	5	5	5	5	5	5	5	5	5	5	5	5	5	5		Equal Mix of Public and Private Sectors	5	2
180	NC	GREENVLL-SPART-ASHEVLL-AND	female	25 to 34	0	0	1	4	5	5	4	5	4	5	5	5	5	5	5	5	5	5	5	1	5		5	3	5	3	5	5	3	4	5	4	5	5	2	3	4	3	3	5	5		Mostly Private Sector	2	2
181	PA	HARRISBURG-LNCSTR-LEB-YORK	female	55 to 64	0	0	1	2	4	3	5	5	3	3	3	5	3	3	2	3	3	5	2	3	2		4	2	2	1	1	1	1	2	4	3	2	2	1	3	2	1	3	2	4		Equal Mix of Public and Private Sectors	2	4
182	CT	NEW YORK	female	35 to 44	1	0	0	3	4	3	4	5	3	3	5	3	3	3	3	3	3	3	3	3	3		2	1	1	2	4	4	3	4	3	3	3	3	3	5	4	3	5	2	3		Equal Mix of Public and Private Sectors	4	2
183	NC	WILMINGTON	female	55 to 64	1	0	0	4	5	5	5	5	5	5	4	5	5	3	5	5	4	4	5	2	4		3	3	3	2	5	4	4	3	4	4	3	3	4	5	4	4	4	4	4		Equal Mix of Public and Private Sectors	2	2
184	FL	TAMPA-ST. PETE (SARASOTA)	male	45 to 54	1	0	0	4	4	4	4	5	5	5	4	5	5	4	5	5	4	4	5	3	5		5	3	3	2	5	5	4	5	3	5	3	3	3	5	5	4	2	4	4		Equal Mix of Public and Private Sectors	2	4
185	MA	BOSTON (MANCHESTER)	female	35 to 44	0	0	1	2	2	1	2	1	2	1	1	2	1	1	1	2	2	1	2	2	1		1	2	1	2	1	1	2	2	2	2	1	1	2	1	1	2	1	1	1		Mostly Public Sector	1	2
186	NY	NEW YORK	male	65 and over	0	0	1	4	2	4	5	4	5	5	4	5	5	2	3	3	3	2	2	4	4	expense is very much debated 5	4	4	5	3	5	5	5	3	3	5	5	4	3	4	5	4	2	3	3		Mostly Public Sector	1	4
187	FL	ORLANDO-DAYTONA BCH-MELBRN	female	18 to 24	0	0	1	3	2	3	3	3	3	3	4	3	4	3	2	4	3	3	2	3	3		4	4	5	3	2	3	2	5	4	4	3	4	2	5	3	3	2	4	3		Mostly Public Sector	3	2
188	PA	WILKES BARRE-SCRANTON-HZTN	female	18 to 24	1	0	0	5	4	5	5	5	4	4	5	5	4	4	5	4	5	4	5	5	5	Have to make sure you’re prepared	3	4	4	4	5	5	5	4	4	4	5	3	3	5	3	4	4	4	5		Equal Mix of Public and Private Sectors	4	4
189	NC	CHARLOTTE	male	45 to 54	0	0	1	4	4	4	5	5	5	4	4	5	5	5	5	5	5	5	5	3	5		5	4	4	2	4	2	3	3	4	4	2	2	2	3	2	3	2	4	3		Equal Mix of Public and Private Sectors	3	4
190	SC	COLUMBIA, SC	female	65 and over	0	0	1	5	5	5	5	5	5	5	5	5	5	5	5	5	5	5	5	5	5		5	1	1	4	4	4	4	4	4	4	4	4	4	4	4	4	4	4	4		Equal Mix of Public and Private Sectors	4	2
191	VA	NORFOLK-PORTSMTH-NEWPT NWS	male	45 to 54	0	0	1	5	5	5	5	5	5	5	5	5	5	5	4	5	5	4	3	4	5		3	4	4	4	4	4	5	5	5	4	4	4	4	4	4	4	4	4	5		Mostly Public Sector	4	5
192	MA	PROVIDENCE-NEW BEDFORD	female	35 to 44	0	0	1	3	3	1	2	2	2	3	2	3	4	3	3	3	4	3	3	3	3		3	1	1	2	5	4	4	5	3	4	4	3	3	4	2	5	4	3	4		Equal Mix of Public and Private Sectors	3	4
193	FL	MIAMI-FT. LAUDERDALE	male	55 to 64	1	0	0	4	1	4	5	3	4	4	1	4	5	3	4	4	4	4	4	3	4		4	1	3	3	4	4	4	4	3	4	2	3	3	4	4	4	4	4	4		Equal Mix of Public and Private Sectors	3	4
194	FL	MOBILE-PENSACOLA (FT WALT)	female	35 to 44	1	0	1	4	5	5	3	4	5	3	4	4	4	4	4	4	4	3	4	4	4		2	2	2	3	4	3	3	3	4	3	3	4	3	4	3	3	3	3	3		Mostly Public Sector	3	4
195	NY	ROCHESTER, NY	male	25 to 34	1	0	0	1	2	3	2	1	3	2	2	1	2	1	2	2	2	2	1	1	2		1	2	2	2	3	1	1	1	2	2	1	2	1	2	1	3	2	3	2		Mostly Private Sector	3	2
196	FL	WEST PALM BEACH-FT. PIERCE	female	25 to 34	1	0	0	5	5	5	5	5	5	5	5	5	5	5	5	5	5	5	5	5	5	5. Funding for potential disaster to homes, boats, etc...	2	3	5	4	5	5	5	5	5	5	5	5	5	5	5	5	5	5	5	5. Homes, Cars, Personal Items, Flooding Inside Homes.	Equal Mix of Public and Private Sectors	5	5
197	CT	HARTFORD & NEW HAVEN	female	35 to 44	0	0	1	3	5	2	3	5	4	4	5	4	3	3	4	4	3	4	3	2	3	Helping lower-income people in flood zones fund the necessary preparations to protect their homes	4	2	2	2	4	4	3	4	2	2	2	2	1	3	3	3	2	2	3		Equal Mix of Public and Private Sectors	1	4
198	ME	PORTLAND-AUBURN	male	18 to 24	1	0	0	2	1	2	1	1	2	2	3	2	2	2	2	2	1	2	1	3	2		2	3	2	4	4	4	3	4	4	5	3	3	2	4	3	4	1	4	4		Mostly Public Sector	2	4
199	FL	ORLANDO-DAYTONA BCH-MELBRN	male	45 to 54	1	0	0	5	4	4	4	4	4	5	5	5	4	3	5	4	4	4	4	2	5	More emergency shelters	5	5	5	5	5	5	2	3	2	3	1	2	1	5	4	3	2	3	2		Mostly Public Sector	4	3
200	FL	MIAMI-FT. LAUDERDALE	male	25 to 34	1	0	0	5	3	5	5	5	5	5	5	5	4	5	4	5	5	5	5	3	5	NA	5	5	4	5	5	5	5	5	5	5	5	5	5	5	5	5	5	5	5	NA	Equal Mix of Public and Private Sectors	2	2
201	NC	RALEIGH-DURHAM (FAYETVLLE)	female	25 to 34	0	0	1	5	5	5	5	5	5	5	5	5	5	5	5	5	5	5	5	5	5		4	4	4	4	5	5	5	5	5	5	5	5	5	5	5	5	5	5	5		Mostly Public Sector	5	5
202	SC	SAVANNAH	female	25 to 34	1	0	0	3	4	3	4	4	4	4	5	4	4	3	4	4	4	3	4	3	4		4	4	4	3	5	4	4	3	3	4	3	3	3	4	3	4	3	3	3		Equal Mix of Public and Private Sectors	2	2
203	NY	NEW YORK	female	25 to 34	0	0	1	5	3	2	4	4	5	5	2	5	4	5	4	5	3	3	5	4	5		4	4	4	3	4	4	4	3	3	4	4	2	2	4	2	2	2	2	2		Equal Mix of Public and Private Sectors	2	2
204	PA	PHILADELPHIA	female	35 to 44	0	0	1	4	4	5	4	5	4	4	4	5	4	4	4	4	4	4	5	4	4	Na	3	2	3	2	3	2	3	3	3	3	3	3	3	3	2	3	3	3	2	Making sure water is good	Mostly Private Sector	5	5
205	NC	GREENVLL-SPART-ASHEVLL-AND	female	35 to 44	0	0	1	5	5	4	4	5	5	5	5	4	5	5	4	4	4	4	5	5	5	i am not sure other than education	2	1	1	4	5	5	3	4	4	5	4	3	3	3	3	3	4	4	4		Equal Mix of Public and Private Sectors	3	4
206	MA	SPRINGFIELD-HOLYOKE	male	65 and over	0	0	1	4	4	4	5	5	5	5	5	5	5	5	5	5	5	4	5	3	5	Getting the Republican party to understand the scientific causes of sea flooding and the associated costs involved. 5	2	2	2	3	4	4	4	4	3	4	3	3	3	4	3	4	3	4	3		Mostly Public Sector	2	2
207	FL	TAMPA-ST. PETE (SARASOTA)	male	35 to 44	0	1	1	5	5	5	5	5	5	5	5	5	5	5	5	5	5	5	5	5	5	one of the most important is having people aware of what to do and where to go, to be prepared	4	2	4	3	5	4	4	5	5	4	5	5	5	5	4	5	3	3	4	persons personal property	Equal Mix of Public and Private Sectors	4	4
208	NY	NEW YORK	male	25 to 34	1	1	1	5	4	5	5	4	5	5	5	5	5	4	4	4	5	5	5	4	5		4	4	4	4	4	4	4	4	4	4	4	4	4	4	4	4	4	4	4		Equal Mix of Public and Private Sectors	4	4
209	NY	NEW YORK	female	18 to 24	0	0	1	4	4	4	5	4	5	5	4	5	4	4	4	4	4	3	4	3	4		3	1	2	3	5	5	4	4	3	4	4	2	2	4	4	4	3	3	5		Mostly Public Sector	2	1
210	NJ	NEW YORK	female	18 to 24	1	0	0	4	3	3	5	4	5	5	3	5	3	5	5	5	4	3	3	3	5		4	5	4	3	5	3	3	5	3	5	4	4	4	3	4	4	5	5	3		Equal Mix of Public and Private Sectors	3	3
211	MD	BALTIMORE	female	35 to 44	0	0	1	5	5	5	5	5	5	5	4	5	4	5	5	5	5	5	5	5	5		4	3	4	3	5	3	5	5	4	4	4	3	2	5	4	5	5	4	5		Entirely Public Sector	3	3
212	VA	NORFOLK-PORTSMTH-NEWPT NWS	female	45 to 54	0	0	1	4	4	5	3	4	5	5	5	5	4	5	5	5	5	5	5	5	5		3	3	3	3	5	5	5	5	5	5	5	5	5	5	5	5	5	5	4	homes	Equal Mix of Public and Private Sectors	2	2
213	DC	WASHINGTON, DC (HAGRSTWN)	male	18 to 24	0	0	1	5	5	5	4	5	5	5	5	5	5	4	5	5	4	4	4	3	4		4	3	4	3	5	5	5	4	4	4	4	3	3	4	4	4	3	3	4		Mostly Public Sector	2	3
214	PA	PHILADELPHIA	female	35 to 44	0	1	0	3	3	3	3	4	4	3	4	3	3	2	4	3	3	3	3	3	4		4	2	3	4	2	2	3	3	2	2	3	3	2	3	3	3	3	3	2		Equal Mix of Public and Private Sectors	2	4
215	VA	NORFOLK-PORTSMTH-NEWPT NWS	male	65 and over	1	0	0	5	5	5	5	5	5	5	5	5	5	5	5	5	5	5	5	5	5		5	5	5	5	5	5	5	5	5	5	5	5	5	5	5	5	5	5	5		Equal Mix of Public and Private Sectors	1	5
216	NC	GREENSBORO-H.POINT-W.SALEM	female	25 to 34	0	0	1	5	4	4	4	5	4	4	5	4	4	4	4	5	4	4	5	4	5		4	4	4	5	4	5	5	4	5	5	4	5	4	4	4	4	4	4	5		Entirely Public Sector	5	5
217	NJ	NEW YORK	female	18 to 24	1	0	0	5	5	3	5	5	5	4	4	5	5	5	4	5	4	4	4	2	5	It is very important to be educated on the matter if one is going to live near the shore. Their houses can be destroyed and they could lose everything they owned. Education is a 5.	4	4	5	3	4	4	5	5	5	4	4	4	4	5	4	4	3	4	4	Houses are a 5	Mostly Public Sector	3	4
218	SC	CHARLOTTE	male	35 to 44	0	0	1	5	1	5	4	3	4	4	3	3	1	5	5	5	4	4	4	5	5		1	2	2	4	4	3	3	5	3	4	4	4	2	5	4	3	5	3	4		Mostly Public Sector	4	2
219	FL	TAMPA-ST. PETE (SARASOTA)	male	35 to 44	1	1	1	3	1	1	3	3	4	4	3	3	1	1	1	1	1	1	3	1	1		3	1	1	3	4	4	1	1	3	4	1	1	1	1	1	1	1	4	1		Equal Mix of Public and Private Sectors	3	3
220	FL	JACKSONVILLE	female	45 to 54	1	1	0	3	3	3	3	3	3	3	3	3	3	3	3	3	3	3	3	3	3		3	3	3	3	3	3	3	3	3	3	3	3	3	3	3	3	3	3	3		Equal Mix of Public and Private Sectors	3	3
221	NC	GREENSBORO-H.POINT-W.SALEM	female	18 to 24	1	0	0	5	5	5	5	5	4	5	5	4	5	5	5	5	5	5	5	5	5		5	5	4	5	5	5	5	5	4	5	5	4	4	3	4	5	5	5	5		Entirely Public Sector	5	5
222	NY	NEW YORK	female	45 to 54	1	1	0	5	5	2	4	5	5	5	5	4	5	4	4	4	5	3	5	3	5		4	2	4	2	4	4	4	4	4	4	4	4	3	4	4	4	4	4	4		Mostly Public Sector	1	2
223	NJ	NEW YORK	male	25 to 34	0	0	1	4	4	4	4	3	4	4	3	5	4	3	3	3	3	3	3	3	3		1	1	1	2	1	4	4	1	1	3	2	1	1	2	2	1	1	1	1		Mostly Public Sector	3	3
224	NY	NEW YORK	female	25 to 34	0	0	1	5	2	5	5	5	4	4	5	5	2	4	4	4	1	2	4	1	4		2	2	2	2	5	5	3	5	3	3	4	3	5	5	5	5	5	4	5		Equal Mix of Public and Private Sectors	5	3
225	MD	BALTIMORE	female	65 and over	0	0	1	5	2	5	5	4	5	3	5	5	2	4	5	5	3	5	4	5	5	Builders need to research the issue of runoff	2	1	1	3	5	5	5	5	4	5	3	3	5	5	4	4	4	1	4	Animal shelters	Equal Mix of Public and Private Sectors	4	4
226	NY	NEW YORK	male	18 to 24	1	0	0	4	4	4	4	4	4	4	4	4	4	4	4	4	4	4	4	4	4	Must get ready to move	4	3	3	3	3	4	3	4	4	4	3	3	3	4	4	3	3	3	4	Boats must be protected	Mostly Public Sector	3	4
227	PA	WILKES BARRE-SCRANTON-HZTN	female	35 to 44	1	0	0	5	5	5	5	5	5	3	5	5	3	5	5	5	5	5	5	5	5		5	5	5	5	3	3	3	3	3	3	3	3	3	3	3	3	3	3	3		Equal Mix of Public and Private Sectors	4	4
228	NY	NEW YORK	male	25 to 34	1	0	0	5	5	5	5	5	5	5	5	5	5	4	4	4	3	4	5	4	5		4	4	4	4	5	4	4	4	4	5	4	4	4	5	5	4	4	4	5		Equal Mix of Public and Private Sectors	4	4
229	FL	TAMPA-ST. PETE (SARASOTA)	female	35 to 44	1	0	0	4	5	3	5	5	3	5	5	5	5	5	3	4	5	5	5	3	5		3	4	3	2	5	5	2	5	3	4	4	3	3	3	2	5	3	4	5		Equal Mix of Public and Private Sectors	2	2
230	NH	BOSTON (MANCHESTER)	female	18 to 24	0	0	1	1	3	3	2	3	1	2	1	2	2	1	3	3	1	1	2	3	2		4	2	5	5	5	4	5	2	1	2	3	1	3	5	4	5	4	4	2		Equal Mix of Public and Private Sectors	2	3
231	NY	BINGHAMTON	female	25 to 34	0	0	1	5	5	3	5	5	5	5	5	5	5	5	5	5	5	5	5	4	5		5	5	5	4	5	5	5	5	5	5	5	4	4	5	4	4	5	5	5		Mostly Public Sector	5	5
232	MD	BALTIMORE	male	65 and over	0	0	1	5	4	4	5	5	4	4	4	4	4	4	5	5	5	5	5	3	4		3	1	4	1	5	5	5	5	5	5	5	4	3	5	5	5	4	5	4		Equal Mix of Public and Private Sectors	3	3
233	NY	NEW YORK	male	25 to 34	0	0	1	1	1	1	1	1	1	1	1	1	1	1	1	1	1	1	1	1	1		5	5	5	5	5	5	5	5	5	5	5	5	5	5	5	5	5	5	5		Mostly Public Sector	5	5
234	NY	NEW YORK	female	45 to 54	0	0	1	4	4	4	4	4	4	4	4	5	4	4	5	4	4	4	4	5	5	yes u should have insurence	5	5	5	5	5	5	5	5	5	5	5	5	5	5	5	4	4	5	5		Equal Mix of Public and Private Sectors	5	5
235	NH	BOSTON (MANCHESTER)	female	35 to 44	0	0	1	4	5	4	5	5	4	4	5	5	4	4	4	4	4	4	5	2	5		2	1	1	3	3	4	3	3	2	3	3	4	2	2	4	4	2	4	4		Mostly Public Sector	1	4
236	FL	JACKSONVILLE	female	45 to 54	0	0	1	5	1	3	5	2	5	3	4	5	2	4	3	2	4	4	5	3	5		4	1	1	3	5	1	5	1	1	2	1	1	4	1	2	3	1	5	1		Equal Mix of Public and Private Sectors	5	2
237	NJ	NEW YORK	female	45 to 54	1	0	0	4	4	5	5	5	5	5	5	5	5	5	4	4	5	5	5	3	5		5	4	4	4	5	5	5	4	3	5	4	3	3	5	4	5	5	5	4		Equal Mix of Public and Private Sectors	2	2
238	FL	MIAMI-FT. LAUDERDALE	male	55 to 64	1	0	0	5	4	5	5	4	5	5	4	5	5	5	4	5	5	4	5	4	5		4	3	4	2	5	5	5	5	4	5	4	4	4	5	4	5	4	4	4		Equal Mix of Public and Private Sectors	3	5
239	NC	RALEIGH-DURHAM (FAYETVLLE)	female	45 to 54	0	0	1	5	2	5	4	4	4	4	4	5	2	4	5	4	3	4	4	2	5		1	1	3	4	5	5	4	5	3	4	4	3	3	4	5	5	3	4	4		Mostly Public Sector	2	4
240	NC	CHARLOTTE	male	45 to 54	0	0	1	3	3	4	4	4	5	5	5	4	2	3	3	5	4	3	4	3	4		2	1	1	3	4	4	3	3	3	3	4	4	3	4	3	4	3	3	3		Mostly Private Sector	4	3
241	NC	GREENSBORO-H.POINT-W.SALEM	female	55 to 64	0	0	1	5	4	4	4	5	5	4	5	4	4	4	3	3	3	4	4	2	5		1	1	3	4	5	5	3	2	2	4	4	2	2	5	4	5	2	2	2		Equal Mix of Public and Private Sectors	2	3
242	NY	NEW YORK	female	55 to 64	0	0	1	5	5	5	5	5	5	5	5	5	5	5	5	5	5	5	5	5	5		5	5	5	5	5	5	5	5	5	5	5	5	5	5	5	5	5	5	5		Entirely Private Sector	5	5
243	MA	PROVIDENCE-NEW BEDFORD	female	35 to 44	1	0	1	5	1	5	4	4	5	5	4	4	2	5	3	4	5	4	3	3	4		3	2	3	3	5	5	5	5	4	5	5	3	4	5	4	5	4	4	4		Equal Mix of Public and Private Sectors	1	4
244	FL	JACKSONVILLE	male	25 to 34	1	0	0	5	5	5	5	5	5	5	5	5	5	5	5	5	5	5	5	4	5		4	5	4	3	5	5	3	5	5	4	3	4	4	4	4	5	3	5	3		Equal Mix of Public and Private Sectors	3	3
245	NY	NEW YORK	female	35 to 44	0	1	0	5	5	5	5	5	5	5	5	5	5	5	5	5	5	5	5	5	5	Housing for displace displace victims after a disaster happen .5	1	1	1	2	5	5	5	5	5	5	5	4	5	5	4	5	4	5	5		Equal Mix of Public and Private Sectors	1	4
246	PA	PHILADELPHIA	female	18 to 24	1	1	0	3	3	1	3	1	1	1	1	3	1	5	3	4	3	3	1	3	5		5	5	5	5	3	3	3	3	3	3	3	3	3	3	3	3	3	3	3		Equal Mix of Public and Private Sectors	4	5
247	NC	CHARLOTTE	female	18 to 24	1	1	1	5	5	5	5	5	5	5	5	5	5	5	5	5	5	5	5	5	5		5	5	4	4	5	4	4	4	4	5	4	5	5	5	5	5	5	4	4		Mostly Public Sector	4	5
248	FL	TAMPA-ST. PETE (SARASOTA)	female	45 to 54	1	0	0	5	5	5	5	5	5	5	5	5	5	5	5	5	5	5	5	5	5		4	4	4	4	4	4	4	4	4	4	4	4	4	4	4	4	4	4	4		Equal Mix of Public and Private Sectors	4	4
249	SC	CHARLESTON, SC	female	25 to 34	1	1	0	5	4	5	5	5	5	5	2	5	5	5	5	5	5	4	5	2	5		5	5	5	3	5	4	5	5	4	4	3	4	5	5	5	5	4	5	5		Equal Mix of Public and Private Sectors	5	4
250	PA	PITTSBURGH	female	18 to 24	1	0	0	5	4	4	4	5	4	5	4	4	4	5	5	5	4	4	5	4	4	making new bridgdes in this area make new ways and roads to avoid traffic	3	3	4	4	4	4	3	4	5	3	2	3	3	4	2	3	3	3	4	security cameras in downtown	Mostly Public Sector	3	4
251	NY	NEW YORK	female	25 to 34	0	0	1	3	3	3	3	3	3	3	3	3	3	3	3	3	3	3	3	3	3	Na	3	3	3	3	3	3	3	3	3	3	3	3	3	3	3	3	3	3	3		Equal Mix of Public and Private Sectors	3	3
252	FL	JACKSONVILLE	male	45 to 54	0	1	0	4	5	4	5	4	4	4	5	5	5	4	5	4	5	4	5	4	5		4	4	4	4	5	5	4	5	4	4	4	4	5	5	5	5	2	4	5		Equal Mix of Public and Private Sectors	1	5
253	NJ	NEW YORK	female	25 to 34	0	0	1	5	5	5	5	5	5	5	5	5	5	5	5	5	5	5	5	5	5		3	3	3	3	4	4	4	4	4	4	4	4	4	4	4	4	4	4	4		Entirely Private Sector	4	4
254	SC	COLUMBIA, SC	female	55 to 64	0	0	1	5	4	4	4	4	4	4	5	4	4	5	5	5	5	4	5	5	5		4	3	3	4	4	4	4	4	4	3	4	4	3	4	4	4	4	4	4		Equal Mix of Public and Private Sectors	4	3
255	FL	MIAMI-FT. LAUDERDALE	female	45 to 54	1	0	0	4	4	4	5	5	5	5	5	4	4	4	4	4	4	4	4	4	4		4	4	4	3	5	5	4	4	4	5	4	4	4	4	4	4	4	5	4		Equal Mix of Public and Private Sectors	3	3
256	NJ	NEW YORK	female	35 to 44	0	0	1	5	3	3	5	4	4	4	4	4	3	2	2	3	2	2	3	2	3	n/a	5	3	4	3	5	3	4	5	4	4	3	4	4	4	4	3	4	3	3		Mostly Public Sector	1	4
257	FL	ORLANDO-DAYTONA BCH-MELBRN	male	65 and over	1	0	0	4	3	3	4	4	3	4	2	4	4	3	4	3	4	3	4	3	4		2	1	2	2	3	4	1	2	3	3	1	2	1	4	3	3	2	4	1		Equal Mix of Public and Private Sectors	3	3
258	FL	ORLANDO-DAYTONA BCH-MELBRN	female	45 to 54	1	0	0	5	5	4	5	4	4	4	4	5	5	4	5	4	4	4	4	2	4	No	4	4	4	2	5	5	5	5	3	4	5	3	4	4	3	5	3	3	3	No	Equal Mix of Public and Private Sectors	1	2
259	SC		female	65 and over	0	0	1	5	4	4	5	5	5	5	4	5	5	5	5	5	5	4	5	4	5	5- The building heights in coastal areas need to be controlled to prevent building issues and damages along the beaches.	3	1	3	2	5	5	3	5	4	4	3	4	4	5	5	5	4	5	4	5- Street flooding during heavy rain is an ongoing issue where cars are being damaged because the street drainage system is inadequate and needs to be upgraded. This doesn't just occur during hurricanes, but when there is heavy rain.	Equal Mix of Public and Private Sectors	1	1
260	NC	CHARLOTTE	male	18 to 24	0	0	1	5	5	4	4	4	5	5	4	5	3	5	4	4	4	4	3	5	5		2	1	2	3	5	5	5	5	5	5	5	5	5	5	5	5	5	5	5		Equal Mix of Public and Private Sectors	3	5
261	NC		female	35 to 44	1	0	0	5	5	5	5	4	5	5	5	5	5	5	5	5	5	5	5	1	5	identifying routes for emergency evacuations	5	4	5	4	4	5	3	5	3	4	3	3	3	5	4	5	3	5	3	Highways and side roads	Entirely Public Sector	5	1
262	PA	PHILADELPHIA	female	35 to 44	0	0	1	5	4	4	5	5	5	3	3	4	3	4	4	4	3	4	5	4	5		4	1	3	3	5	3	4	4	4	5	5	3	3	5	5	4	5	4	5	people	Equal Mix of Public and Private Sectors	1	3
263	NH	BOSTON (MANCHESTER)	male	35 to 44	0	0	1	5	4	5	5	5	5	3	4	4	4	5	5	4	4	5	5	5	4		2	1	2	2	4	3	4	4	4	4	4	4	4	4	3	4	4	3	5		Entirely Public Sector	3	4
264	NJ	NEW YORK	female	25 to 34	0	1	0	4	1	1	2	3	2	1	1	3	2	4	3	2	4	5	1	2	2		4	2	1	4	4	3	2	1	3	2	3	3	1	4	5	3	3	3	3		Entirely Public Sector	3	1
265	FL	ORLANDO-DAYTONA BCH-MELBRN	male	55 to 64	0	0	1	4	4	3	4	4	4	4	4	3	3	5	4	4	4	3	4	3	4		3	2	4	3	5	5	4	5	5	5	4	4	4	5	4	5	4	4	4		Equal Mix of Public and Private Sectors	3	4
266	FL	TALLAHASSEE-THOMASVILLE	male	45 to 54	0	0	1	4	4	4	3	4	4	4	4	4	4	4	4	3	3	3	4	4	4		3	2	3	3	3	3	3	2	3	3	2	2	3	3	2	3	3	3	3		Mostly Public Sector	2	2
267	NJ	NEW YORK	male	45 to 54	0	0	1	4	4	5	5	4	5	4	5	5	4	5	4	4	5	3	4	4	5		1	1	1	3	5	4	5	3	3	4	2	3	3	5	4	5	4	2	4		Equal Mix of Public and Private Sectors	5	4
268	FL	FT. MYERS-NAPLES	female	35 to 44	1	0	0	5	5	5	5	5	5	5	5	5	4	4	5	5	4	4	4	3	5		5	2	2	4	5	5	3	3	4	5	2	3	3	5	5	4	4	5	5		Mostly Public Sector	2	1
269	NC	RALEIGH-DURHAM (FAYETVLLE)	male	65 and over	0	0	1	1	1	1	1	1	1	1	1	1	1	1	1	1	1	1	1	1	1		1	1	1	1	1	1	1	1	1	1	1	1	1	1	2	1	2	1	1		Equal Mix of Public and Private Sectors	1	1
270	FL	WEST PALM BEACH-FT. PIERCE	female	65 and over	1	0	0	1	2	1	1	1	1	2	1	1	1	1	1	1	1	1	1	1	1		2	2	2	2	2	3	2	2	2	2	3	2	2	2	2	2	2	2	2		Equal Mix of Public and Private Sectors	2	3
271	FL	ORLANDO-DAYTONA BCH-MELBRN	female	45 to 54	0	0	1	5	5	5	5	5	5	5	5	5	5	5	5	5	5	5	5	1	5	5 people need to be informed more of what they can do to protect themselves 4 government needs to help the lower income people and provide for help	1	1	2	3	5	5	3	4	4	4	2	4	1	5	4	4	1	5	5		Mostly Public Sector	2	1
272	NC	CHARLOTTE	female	18 to 24	0	0	1	4	5	4	4	5	5	4	5	4	4	4	5	5	4	5	4	5	4		4	4	3	5	5	5	4	4	4	4	4	3	2	5	3	5	2	4	5		Equal Mix of Public and Private Sectors	4	4
273	FL	JACKSONVILLE	female	35 to 44	1	0	0	4	3	3	5	5	5	5	5	5	3	3	2	4	3	3	2	2	5		4	2	3	2	5	5	4	5	4	5	2	4	2	2	2	5	3	5	4		Equal Mix of Public and Private Sectors	2	3
274	NC	GREENSBORO-H.POINT-W.SALEM	female	65 and over	0	0	1	1	1	1	1	1	2	1	1	2	2	4	4	4	4	3	3	3	4		1	1	1	2	4	3	3	3	2	4	3	2	4	3	3	4	2	3	3		Equal Mix of Public and Private Sectors	3	3
275	NC	CHARLOTTE	female	25 to 34	0	0	1	4	5	4	5	5	4	4	4	4	4	4	4	4	4	4	4	4	5		3	2	3	3	5	5	5	4	4	5	4	5	3	5	4	4	4	5	4		Mostly Public Sector	3	2
276	FL	MIAMI-FT. LAUDERDALE	male	18 to 24	1	0	0	5	5	5	5	5	5	5	5	5	5	5	5	5	5	5	5	2	5		5	3	5	3	5	5	5	4	3	5	3	3	1	3	3	4	3	3	1		Equal Mix of Public and Private Sectors	3	2
277	CT	HARTFORD & NEW HAVEN	female	55 to 64	1	0	1	2	2	1	1	1	1	1	1	2	2	5	5	5	4	4	5	3	4		2	3	3	3	5	5	4	4	4	4	3	4	4	4	4	3	4	5	5		Equal Mix of Public and Private Sectors	1	2
278	FL	MIAMI-FT. LAUDERDALE	female	25 to 34	1	0	0	5	5	3	5	5	5	5	5	5	5	5	5	5	5	4	5	5	5		5	4	5	4	5	5	5	5	5	5	4	3	5	4	3	5	2	3	1		Equal Mix of Public and Private Sectors	1	5
279	FL	MOBILE-PENSACOLA (FT WALT)	female	35 to 44	1	0	0	5	4	3	4	5	5	5	4	4	4	4	4	4	4	4	4	4	4		3	2	3	4	5	4	4	5	4	5	2	4	4	5	4	4	4	5	5		Equal Mix of Public and Private Sectors	5	2
280	SC		male	65 and over	0	0	1	2	2	2	1	1	1	1	2	2	2	2	2	2	2	3	2	2	2		2	2	2	2	4	4	4	3	4	4	4	4	3	4	3	4	4	4	4		Mostly Public Sector	3	4
281	DC	WASHINGTON, DC (HAGRSTWN)	female	35 to 44	0	0	1	2	2	2	1	1	2	1	2	1	1	5	5	4	4	4	5	3	5		3	2	3	1	5	4	4	4	4	4	2	3	3	4	4	4	3	5	4		Mostly Public Sector	1	3
282	FL	ORLANDO-DAYTONA BCH-MELBRN	female	18 to 24	1	1	1	3	4	4	5	5	4	5	5	5	5	4	5	5	5	5	4	5	4		5	5	5	5	5	4	4	4	4	4	5	5	4	5	5	5	4	5	4		Entirely Private Sector	4	4
283	FL	TAMPA-ST. PETE (SARASOTA)	male	55 to 64	1	0	0	5	1	5	2	2	5	1	2	3	1	1	1	3	1	1	1	5	2	Getting our republican legislative bodies to admit it is real 5	5	4	5	5	5	3	3	4	5	2	2	3	1	3	3	3	3	3	5	Natural wetlands which would lower our risk Moderately (3) 5	Mostly Public Sector	1	2
284	NJ	PHILADELPHIA	female	35 to 44	0	0	1	5	2	5	4	5	4	4	3	4	3	5	4	2	3	4	5	2	4		3	1	1	4	5	5	4	4	4	4	2	3	3	5	3	5	3	4	2	Senior care centers and communities. 4 Schools 4	Equal Mix of Public and Private Sectors	5	4
285	NY	BUFFALO	female	35 to 44	0	0	1	3	5	4	4	5	5	4	4	3	4	5	5	4	5	3	4	2	4		1	1	1	4	3	5	5	1	3	5	2	1	1	5	4	3	3	2	4		Equal Mix of Public and Private Sectors	4	2
286	NJ	NEW YORK	female	65 and over	1	0	0	4	5	5	5	5	5	5	4	5	5	5	4	5	4	5	5	5	5		4	4	4	4	5	5	5	5	5	5	5	4	4	5	4	5	4	5	5		Mostly Public Sector	3	3
287	VA	NORFOLK-PORTSMTH-NEWPT NWS	female	35 to 44	1	0	0	4	4	4	4	4	4	4	4	4	4	4	4	4	4	4	4	3	4		3	3	3	4	4	4	3	4	4	4	3	3	3	4	3	4	3	4	4		Equal Mix of Public and Private Sectors	3	4
288	NY	SYRACUSE	female	18 to 24	1	0	0	5	5	5	5	5	5	5	5	5	5	5	5	5	5	5	5	5	5		5	5	5	5	5	5	5	5	5	5	5	5	5	5	5	5	5	5	5		Equal Mix of Public and Private Sectors	5	5
289	FL	MIAMI-FT. LAUDERDALE	female	18 to 24	1	0	0	5	5	5	5	5	3	3	3	5	4	4	4	4	4	4	4	4	4		5	4	5	4	4	5	3	5	5	5	5	5	5	5	5	3	4	5	5		Entirely Public Sector	4	4
290	NY	BUFFALO	male	35 to 44	0	0	1	3	3	4	3	4	3	3	3	2	4	2	4	4	4	3	4	4	3	no	4	5	5	3	4	3	4	4	4	4	2	5	4	4	4	4	4	4	5		Mostly Private Sector	3	4
291	SC	COLUMBIA, SC	female	25 to 34	0	0	1	5	1	5	5	3	5	5	5	5	5	5	5	5	5	5	5	5	5		5	5	5	5	5	5	5	5	5	5	5	5	5	5	5	5	5	5	5		Equal Mix of Public and Private Sectors	1	1
292	NJ	PHILADELPHIA	female	45 to 54	1	0	0	5	5	5	4	5	4	4	4	4	4	5	3	4	4	4	4	3	5	Planned shelters	4	4	4	3	4	4	4	4	4	5	4	4	4	3	3	3	3	5	5		Equal Mix of Public and Private Sectors	3	4
293	MA	BOSTON (MANCHESTER)	female	65 and over	1	0	0	5	5	5	5	5	5	5	5	5	4	4	5	4	5	4	5	4	5		3	3	3	3	4	4	3	3	3	4	3	4	4	4	3	3	3	4	4		Equal Mix of Public and Private Sectors	2	2
294	MA	BOSTON (MANCHESTER)	male	25 to 34	1	1	0	5	5	3	5	5	4	5	4	5	4	4	5	5	4	4	5	3	5	1 educating younger adults on how to handle flooding 2 Not trying to play a hero but be assertive 3 always stay safe 4 be very alert and communicate well with others 5 just Learn to stay away from deadly situations	3	3	2	4	5	5	5	5	4	4	4	3	4	5	4	4	4	3	4		Equal Mix of Public and Private Sectors	3	3
295	CT	NEW YORK	female	55 to 64	0	0	1	4	4	4	3	5	4	4	4	3	3	4	3	3	4	3	4	3	3		1	1	1	1	5	3	3	3	3	3	3	3	1	2	1	2	4	4	5		Equal Mix of Public and Private Sectors	3	4
296	NY	NEW YORK	male	55 to 64	1	0	0	3	1	5	2	1	3	5	3	2	2	4	3	3	4	3	3	3	4		3	3	3	3	5	5	4	5	1	5	4	2	2	4	2	4	3	3	3		Entirely Public Sector	3	3
297	NY	NEW YORK	female	25 to 34	1	1	1	5	5	4	4	4	5	5	4	5	4	5	5	4	4	4	4	1	4		4	2	3	2	5	4	4	4	4	4	5	2	2	4	4	4	2	4	2		Equal Mix of Public and Private Sectors	1	1
298	DC	WASHINGTON, DC (HAGRSTWN)	female	25 to 34	1	1	1	5	5	4	5	5	5	4	5	4	3	4	4	5	3	4	3	5	5		3	3	3	2	3	4	3	3	4	4	3	4	3	3	2	3	2	3	4		Mostly Private Sector	3	3
299	FL	GAINESVILLE	male	55 to 64	0	0	1	5	4	5	5	5	5	5	5	5	4	4	4	5	4	4	4	4	5		1	1	1	2	4	5	5	5	4	4	2	4	3	4	4	4	3	1	3		Equal Mix of Public and Private Sectors	1	4
300	PA	PHILADELPHIA	male	65 and over	0	0	1	4	3	2	4	4	4	3	3	2	2	2	1	4	3	1	1	1	1		3	1	1	3	2	2	2	2	1	2	1	1	1	2	1	2	1	1	1		Equal Mix of Public and Private Sectors	1	2
301	FL	ORLANDO-DAYTONA BCH-MELBRN	male	65 and over	1	0	0	5	5	5	5	5	5	5	5	5	5	5	5	5	5	5	5	5	5	Using equipment to relocate beach sands into walls before hurricanes to reduce sea coastal damages to minimize flooding.	5	5	5	5	5	5	5	5	5	5	4	5	5	5	4	5	4	5	5	N/A	Entirely Private Sector	4	5
302	ME	PORTLAND-AUBURN	female	45 to 54	0	0	1	4	2	5	4	5	5	4	5	2	1	1	2	2	2	4	2	1	2		1	2	1	2	1	2	1	1	1	3	1	1	1	2	1	1	1	2	2		Mostly Private Sector	4	3
303	NJ	NEW YORK	female	35 to 44	1	0	0	3	3	3	3	3	3	3	3	3	3	3	3	3	3	3	3	3	3		3	3	3	3	3	3	3	3	3	3	3	3	3	3	3	3	3	3	3		Equal Mix of Public and Private Sectors	3	3
304	SC	COLUMBIA, SC	female	65 and over	0	0	1	5	5	5	5	5	5	5	5	5	5	5	5	5	5	5	5	5	5		2	2	2	2	5	4	4	5	4	5	3	4	5	5	4	3	4	4	4		Equal Mix of Public and Private Sectors	1	1
305	NC	GREENVILLE-N.BERN-WASHNGTN	male	18 to 24	1	0	0	4	4	5	1	3	1	5	4	3	3	2	2	2	2	2	2	2	2		2	2	2	2	3	3	3	3	3	3	3	3	3	3	3	3	3	3	3		Mostly Private Sector	3	3
306	PA	WILKES BARRE-SCRANTON-HZTN	female	25 to 34	1	0	0	4	5	5	5	5	5	5	5	5	3	5	5	5	5	5	5	3	5		3	1	1	2	5	5	5	4	4	5	5	4	4	5	4	5	4	4	4		Equal Mix of Public and Private Sectors	4	4
307	NY	BUFFALO	female	25 to 34	0	0	1	4	5	3	3	5	4	4	4	1	1	1	2	2	1	1	1	1	1		1	1	1	4	5	5	5	5	5	4	1	4	1	5	3	3	4	2	4		Mostly Private Sector	3	2
308	NC	GREENSBORO-H.POINT-W.SALEM	male	65 and over	0	0	1	5	5	4	5	5	5	5	5	5	5	5	5	4	4	5	5	1	5		3	4	4	3	5	4	2	4	4	3	3	3	3	3	1	3	2	3	2		Equal Mix of Public and Private Sectors	1	3
309	MD	BALTIMORE	male	45 to 54	0	0	1	4	4	2	4	5	5	5	3	3	4	2	2	2	2	2	2	2	2		1	2	1	3	2	2	2	2	2	2	2	2	2	2	2	2	2	2	2		Equal Mix of Public and Private Sectors	3	2
310	MD	WASHINGTON, DC (HAGRSTWN)	female	25 to 34	0	0	1	5	3	5	5	4	3	4	5	3	4	4	4	5	4	5	5	5	5		4	4	3	3	4	5	4	4	4	4	4	4	4	4	4	4	4	5	5		Equal Mix of Public and Private Sectors	4	4
311	NC	GREENSBORO-H.POINT-W.SALEM	female	45 to 54	0	0	1	5	5	5	4	5	4	4	5	5	4	4	4	3	4	4	5	2	5		5	2	3	2	5	5	5	5	4	4	3	3	2	4	4	4	3	4	4		Mostly Public Sector	2	1
312	NY	NEW YORK	male	55 to 64	1	0	1	5	3	4	4	5	5	5	4	4	3	4	5	5	4	4	4	2	5	Making sure new home construction protects against flooding	3	2	2	2	5	5	4	5	1	4	4	2	2	4	3	3	2	4	4		Mostly Public Sector	1	3
313	NY	NEW YORK	female	25 to 34	0	0	1	5	5	5	5	5	5	4	5	5	3	4	5	5	5	5	4	3	5		3	2	1	3	5	5	4	4	3	4	3	2	3	4	3	3	3	3	3		Mostly Public Sector	2	4
314	NJ	NEW YORK	female	25 to 34	0	0	1	5	3	5	5	4	5	5	4	5	5	4	4	5	4	5	4	2	5		3	4	3	3	5	4	5	5	4	4	5	5	3	5	4	3	3	3	3		Entirely Public Sector	2	2
315	NY	ALBANY-SCHENECTADY-TROY	female	45 to 54	0	0	1	2	3	4	5	5	4	5	2	4	4	3	4	4	5	4	3	2	4		2	2	2	2	5	4	3	4	4	4	3	3	1	4	4	4	2	4	5		Equal Mix of Public and Private Sectors	1	3
316	PA	WILKES BARRE-SCRANTON-HZTN	female	45 to 54	0	0	1	1	3	3	3	2	1	1	1	2	2	1	2	1	2	1	3	2	2		2	3	4	2	3	4	3	4	3	2	3	3	2	4	4	3	2	3	4		Equal Mix of Public and Private Sectors	3	4
317	FL	WEST PALM BEACH-FT. PIERCE	male	65 and over	1	0	0	5	2	5	4	3	5	4	4	4	4	4	4	4	4	3	4	3	4		2	1	2	2	5	5	4	4	4	4	4	3	4	4	3	5	1	4	3		Equal Mix of Public and Private Sectors	3	3
318	FL	JACKSONVILLE	female	45 to 54	1	0	0	4	3	3	4	4	2	4	4	4	3	4	4	4	4	4	4	4	5		3	3	3	2	4	4	4	4	4	3	4	3	4	4	4	4	3	4	4		Equal Mix of Public and Private Sectors	2	3
319	ME	PORTLAND-AUBURN	female	65 and over	0	0	1	5	5	5	5	5	5	5	5	5	5	5	5	5	5	5	5	3	5		4	4	4	3	4	3	3	3	3	4	2	3	3	3	3	3	3	4	4		Equal Mix of Public and Private Sectors	1	4
320	RI	PROVIDENCE-NEW BEDFORD	male	65 and over	1	0	0	2	2	2	2	2	2	2	2	2	2	3	3	3	3	3	3	3	3		1	1	1	1	1	1	1	1	1	1	1	1	1	1	1	1	1	1	1		Equal Mix of Public and Private Sectors	1	1
321	NY	NEW YORK	female	65 and over	0	0	1	5	4	4	4	5	4	5	4	5	4	3	3	4	2	3	3	4	4		4	3	4	4	5	5	5	5	4	4	5	4	3	4	4	5	3	5	4		Equal Mix of Public and Private Sectors	1	4
322	NY	NEW YORK	female	25 to 34	0	0	1	4	4	4	4	5	4	5	4	5	4	5	5	5	5	5	5	2	5		4	4	4	4	4	4	4	4	4	4	4	4	4	4	4	4	4	4	4		Mostly Public Sector	3	1
323	NC	WILMINGTON	male	25 to 34	1	0	0	5	3	5	5	4	5	5	4	1	2	5	4	5	3	4	2	5	5	We must prepare ourselves for the fact that ocean levels may not rise and it's all part of liberal media	5	1	2	5	5	5	5	5	5	5	5	5	5	5	5	5	5	5	5	Pirates deck the local bar	Entirely Public Sector	3	3
324	NC	RALEIGH-DURHAM (FAYETVLLE)	female	18 to 24	0	0	1	5	4	4	5	5	5	4	5	4	4	4	4	5	4	4	3	3	5		4	4	4	4	4	4	4	4	3	4	4	3	3	3	3	4	3	4	3		Equal Mix of Public and Private Sectors	4	3
325	FL	ORLANDO-DAYTONA BCH-MELBRN	female	55 to 64	0	0	1	5	5	5	5	5	5	5	5	5	5	5	5	5	5	5	5	3	5	education about climate change	3	4	3	4	5	5	1	5	5	5	1	3	3	5	5	5	3	5	3	Nursing homes	Mostly Public Sector	1	3
326	MD	BALTIMORE	male	65 and over	0	0	1	4	4	5	5	4	4	5	4	4	5	4	4	4	5	5	4	4	5	future flooding can be avoided if some basic work in the sea	5	4	4	4	4	5	5	4	4	5	3	5	4	5	5	5	4	3	5	public hospitals	Equal Mix of Public and Private Sectors	3	5
327	NH	BOSTON (MANCHESTER)	female	55 to 64	0	0	1	5	5	5	5	5	5	5	5	5	5	3	5	4	4	3	2	3	5		3	1	1	3	5	5	4	5	4	5	5	5	3	4	4	5	4	1	4		Equal Mix of Public and Private Sectors	4	4
328	SC	MYRTLE BEACH-FLORENCE	female	18 to 24	1	1	0	5	5	4	4	5	4	4	5	5	5	4	4	5	4	5	5	5	4		5	4	4	3	5	5	5	5	5	4	4	5	5	5	5	5	5	4	5		Mostly Public Sector	4	5
329	PA	PHILADELPHIA	female	35 to 44	1	0	0	5	5	5	5	5	5	5	5	5	5	5	5	5	5	5	5	5	5	we always need to be ready	5	5	5	5	5	5	4	3	4	4	5	5	5	5	5	4	4	4	4		Equal Mix of Public and Private Sectors	5	5
330	MD	WASHINGTON, DC (HAGRSTWN)	male	25 to 34	0	1	1	4	4	4	4	5	4	4	5	4	4	5	5	4	4	4	4	2	4		2	2	2	1	4	4	4	3	4	4	4	4	4	3	4	5	4	5	4		Equal Mix of Public and Private Sectors	2	3
331	VA	NORFOLK-PORTSMTH-NEWPT NWS	female	35 to 44	1	0	0	5	5	5	5	5	5	5	5	5	5	5	5	5	5	5	5	5	5		5	5	5	5	5	5	5	5	5	5	5	5	5	5	5	5	5	5	5		Equal Mix of Public and Private Sectors	5	5
332	FL	TAMPA-ST. PETE (SARASOTA)	female	55 to 64	0	0	1	4	4	3	4	4	4	4	4	4	4	4	4	4	4	5	4	4	4		3	3	3	3	5	5	5	4	5	4	4	4	3	4	4	4	5	5	5		Equal Mix of Public and Private Sectors	4	4
333	NC	CHARLOTTE	female	45 to 54	1	0	0	4	5	4	5	5	5	5	5	5	5	5	5	5	4	5	5	2	5	Stop development in flood prone areas. 1 Find ways for commuters to get home when flooding closes many streets. 2 Improve drainage to prevent so many road closures 3 Consider delay of school during high tide and flooding 4 Help the people who have lost their homes more than once due to flooding 5	5	5	5	4	5	5	4	5	4	5	4	4	4	5	4	5	4	4	4	Hospitals 5	Equal Mix of Public and Private Sectors	3	3
334	NJ	PHILADELPHIA	female	55 to 64	1	0	0	4	4	5	5	5	4	4	3	5	4	5	5	5	4	4	5	3	5		4	5	5	4	5	4	3	5	3	4	4	3	4	5	4	5	4	5	5		Equal Mix of Public and Private Sectors	2	3
335	FL	TAMPA-ST. PETE (SARASOTA)	female	65 and over	1	0	0	3	4	3	4	4	5	4	4	5	5	5	5	5	5	4	5	5	4		3	2	4	2	4	4	4	3	4	4	3	3	3	4	3	4	3	4	4		Equal Mix of Public and Private Sectors	2	3
336	RI	PROVIDENCE-NEW BEDFORD	male	65 and over	1	0	0	5	5	5	5	5	5	5	5	5	5	5	5	5	5	5	5	5	5		5	5	3	3	5	5	5	5	5	5	5	5	5	5	5	5	5	5	5		Equal Mix of Public and Private Sectors	3	3
337	MD	BALTIMORE	male	25 to 34	1	0	0	3	5	4	4	3	5	5	5	5	4	3	4	2	2	3	4	1	5	Making sure those who can't evacuate by themselves have help - 5	3	3	3	3	5	5	4	2	4	4	5	3	3	5	5	5	3	3	3		Mostly Public Sector	1	1
338	NY	NEW YORK	male	45 to 54	1	1	1	5	4	5	5	5	5	5	4	5	5	5	5	5	4	4	5	4	5		3	3	3	2	5	5	5	5	4	5	5	4	4	4	4	4	3	4	4		Equal Mix of Public and Private Sectors	4	4
339	VA	NORFOLK-PORTSMTH-NEWPT NWS	female	25 to 34	0	0	1	4	4	5	4	4	4	4	4	4	4	4	5	5	5	4	5	4	5		3	3	3	3	5	4	5	5	5	4	4	4	3	4	3	5	4	4	5		Mostly Public Sector	1	4
340	PA	BUFFALO	female	25 to 34	0	0	1	5	4	5	5	5	5	4	5	5	5	4	4	5	5	4	4	4	4	giving the locals knowledge on what and what not to do 5	3	2	3	3	5	5	5	5	4	4	4	4	4	5	3	3	3	3	4	homes and humans are key priority in my eyes	Equal Mix of Public and Private Sectors	3	3
341	RI	PROVIDENCE-NEW BEDFORD	male	35 to 44	1	0	0	4	3	5	4	4	5	4	3	4	3	4	4	4	5	3	4	3	4		4	3	4	4	5	5	5	5	3	5	4	4	4	4	3	4	3	3	3		Equal Mix of Public and Private Sectors	2	4
342	FL	MIAMI-FT. LAUDERDALE	female	55 to 64	0	0	1	3	1	3	2	1	2	1	2	2	1	5	4	4	2	4	4	1	5	1. Education about and required modifications ( solar and wind generated electricity) to reduce global warming.	5	2	4	3	5	5	3	5	4	5	4	4	2	2	3	4	3	3	4		Mostly Public Sector	2	2
343	FL	FT. MYERS-NAPLES	male	55 to 64	1	0	0	5	5	5	5	5	5	5	5	5	5	5	5	5	5	5	5	5	5		5	5	5	5	5	5	5	5	5	5	5	5	5	5	5	5	5	5	5		Entirely Public Sector	5	5
344	NC	WILMINGTON	female	18 to 24	0	1	0	3	1	3	1	1	1	2	1	1	1	3	4	3	3	3	2	2	2		3	3	2	2	5	3	4	3	4	3	3	4	5	3	3	3	2	3	5		Equal Mix of Public and Private Sectors	2	3
345	FL	JACKSONVILLE	female	25 to 34	1	0	0	5	3	3	5	5	5	4	4	5	4	2	5	4	4	5	5	2	5	Repairing damage that has already happened from Hurricane Irma- 5	4	4	4	4	5	5	2	4	3	4	2	3	4	4	4	4	2	4	3	Historic Sites- 5	Mostly Public Sector	1	5
346	NY	NEW YORK	male	25 to 34	0	0	1	2	1	1	1	1	1	1	2	1	1	1	1	1	1	1	1	2	1	1. teaching people that this is happening 2. having town meetings 3. social media awareness 4. allowing schools to teach this to young adults 5. finding ways to prevent it from occurring sooner than expected	3	4	4	3	5	5	4	5	4	3	3	3	3	3	3	3	2	2	4		Equal Mix of Public and Private Sectors	3	4
347	FL	MIAMI-FT. LAUDERDALE	female	45 to 54	1	0	0	4	4	3	5	5	4	4	5	4	4	4	4	4	4	4	4	1	4		4	4	4	4	5	4	3	3	4	3	3	4	1	4	3	3	3	4	4		Mostly Public Sector	2	3
348	DC	WASHINGTON, DC (HAGRSTWN)	female	18 to 24	0	0	1	4	4	4	5	4	3	5	3	5	4	3	3	3	5	3	5	3	3	N/A	4	4	4	3	4	4	4	4	4	4	3	3	3	4	4	4	3	5	5	N/A	Equal Mix of Public and Private Sectors	1	3
349	ME	PORTLAND-AUBURN	female	25 to 34	0	0	1	4	2	5	4	4	5	5	5	1	1	1	1	2	1	2	1	4	1		1	1	1	1	4	5	4	1	2	5	1	1	1	5	1	2	1	1	1		Equal Mix of Public and Private Sectors	2	5
350	PA	PITTSBURGH	female	25 to 34	0	0	1	4	4	4	3	5	5	4	5	4	4	4	5	4	4	5	3	3	4	N/A	2	3	3	2	5	5	4	4	5	5	5	4	5	5	4	5	4	4	4		Mostly Public Sector	2	2
351	VA	WASHINGTON, DC (HAGRSTWN)	female	25 to 34	0	0	1	4	4	3	5	4	5	5	5	5	4	4	4	5	5	4	5	3	5		4	4	5	3	5	5	4	4	4	5	3	3	4	4	5	4	5	5	4		Equal Mix of Public and Private Sectors	4	3
352	NC	RALEIGH-DURHAM (FAYETVLLE)	female	35 to 44	0	0	1	4	3	4	4	4	4	5	3	3	3	3	3	3	3	3	5	4	4		3	1	2	3	3	4	3	3	3	4	3	3	3	2	2	3	2	2	3		Equal Mix of Public and Private Sectors	3	3
353	NC	RALEIGH-DURHAM (FAYETVLLE)	female	18 to 24	0	0	1	3	3	3	4	4	4	4	4	4	4	4	3	4	4	3	4	4	3		3	3	3	3	3	3	3	3	3	3	3	3	3	3	3	3	3	3	3		Equal Mix of Public and Private Sectors	3	3
354	MA	BOSTON (MANCHESTER)	female	18 to 24	1	0	0	4	4	4	4	4	4	4	5	4	3	5	4	4	5	4	4	4	4		4	4	5	4	4	5	4	4	3	5	1	4	3	4	4	5	4	4	4		Equal Mix of Public and Private Sectors	4	3
355	NY	NEW YORK	male	25 to 34	0	0	1	3	3	3	4	5	4	4	5	2	4	4	3	3	3	3	2	3	4		3	4	5	3	4	2	3	2	2	1	3	2	1	3	3	5	2	2	2		Mostly Private Sector	3	3
356	NY	SYRACUSE	female	35 to 44	0	0	1	4	2	4	5	5	5	4	5	5	5	5	5	5	4	5	5	4	5	N/a	3	2	3	3	5	3	5	4	3	4	3	3	3	5	5	3	3	4	3		Equal Mix of Public and Private Sectors	2	2
357	VA	ROANOKE-LYNCHBURG	female	25 to 34	0	0	1	4	4	2	4	4	4	4	4	4	4	5	4	5	5	4	4	2	5		4	3	4	3	5	3	4	4	4	4	4	3	3	5	4	5	3	4	4		Equal Mix of Public and Private Sectors	2	4
358	FL	ORLANDO-DAYTONA BCH-MELBRN	female	25 to 34	0	0	1	5	5	4	5	5	5	5	5	5	5	4	5	5	4	4	5	1	4	creating climate change policies	2	3	3	3	5	4	4	4	4	4	4	4	4	5	3	4	4	4	5		Mostly Public Sector	2	4
359	NY	NEW YORK	male	25 to 34	1	0	0	1	2	1	1	1	1	1	1	1	1	1	1	1	1	1	1	1	1		5	1	3	5	5	4	5	4	5	4	3	3	5	5	3	5	4	5	5		Equal Mix of Public and Private Sectors	3	3
360	SC	CHARLESTON, SC	female	18 to 24	1	0	0	5	2	4	5	5	4	4	5	5	5	5	5	4	1	5	5	2	5		5	4	4	3	4	5	3	4	3	5	1	4	5	5	5	4	2	5	5		Equal Mix of Public and Private Sectors	1	2
361	NY	NEW YORK	male	35 to 44	0	0	1	2	3	3	3	3	2	2	2	3	3	3	3	3	3	3	3	3	3		4	3	3	4	2	2	2	2	2	2	2	2	2	2	2	2	2	2	2		Mostly Public Sector	1	1
362	NY	NEW YORK	female	55 to 64	1	0	0	5	5	5	5	5	4	5	4	5	5	5	5	5	5	5	4	5	5		2	3	3	4	4	3	4	4	4	4	5	3	4	5	3	3	3	2	3		Equal Mix of Public and Private Sectors	3	3
363	SC	CHARLOTTE	female	25 to 34	0	0	1	4	2	2	1	2	5	3	3	1	1	3	3	3	3	3	3	3	3		4	1	1	1	3	4	1	3	4	5	1	3	1	3	3	3	5	1	1		Mostly Public Sector	4	3
364	MD	WASHINGTON, DC (HAGRSTWN)	female	35 to 44	0	0	1	5	5	5	5	5	5	5	5	5	5	5	5	5	5	4	5	1	5	Safety is the biggest concern	5	4	5	5	5	5	3	5	5	5	4	4	4	5	5	5	5	5	5		Entirely Public Sector	4	3
365	PA	PHILADELPHIA	female	35 to 44	0	1	0	4	4	4	4	4	4	4	5	4	4	4	4	4	4	4	4	4	4	Na	4	4	4	4	3	3	3	3	4	4	3	4	3	3	3	3	3	3	4		Mostly Public Sector	4	4
366	NY	ALBANY-SCHENECTADY-TROY	female	55 to 64	0	0	1	5	5	4	5	5	5	5	5	5	5	4	4	4	4	4	4	4	4		2	2	1	2	5	5	5	5	5	5	5	4	5	5	5	5	5	4	5		Equal Mix of Public and Private Sectors	3	3
367	CT	HARTFORD & NEW HAVEN	female	35 to 44	0	0	1	5	4	3	5	5	5	5	4	5	4	4	4	4	4	3	4	4	5		2	2	2	2	4	4	3	4	3	3	3	2	2	3	3	2	3	4	2		Equal Mix of Public and Private Sectors	2	1
368	PA	HARRISBURG-LNCSTR-LEB-YORK	female	35 to 44	0	0	1	5	3	3	5	5	5	5	5	5	3	5	5	4	5	5	5	3	5		2	2	2	2	5	5	5	5	3	5	5	2	4	5	5	5	4	5	4		Entirely Public Sector	1	3
369	NJ	NEW YORK	female	45 to 54	0	0	1	4	5	4	5	5	4	4	4	5	5	5	5	5	5	5	4	3	5	Wildlife habitat protections	4	3	4	4	5	5	5	5	4	4	4	4	4	4	4	4	4	4	4		Equal Mix of Public and Private Sectors	3	4
370	NY	NEW YORK	female	65 and over	0	0	1	5	3	4	5	5	5	5	4	5	5	4	5	5	5	4	5	2	5		4	1	2	3	5	5	5	5	4	5	4	4	4	5	4	5	4	4	4		Equal Mix of Public and Private Sectors	3	4
371	NY	NEW YORK	female	25 to 34	1	0	0	3	4	2	4	4	5	5	5	5	4	2	5	5	3	4	4	3	5		4	2	3	2	5	5	3	2	2	4	4	3	3	5	4	2	2	2	2		Mostly Public Sector	1	5
372	NC	CHARLOTTE	female	35 to 44	0	0	1	4	2	5	4	4	5	5	4	3	4	4	4	5	4	4	2	3	5	5 Need to stop encouraging/allowing people to build in flood zones, then using tax money to pay for flood damage,	2	1	2	3	5	4	4	5	3	4	4	3	3	4	3	4	2	3	3		Equal Mix of Public and Private Sectors	3	3
373	SC	COLUMBIA, SC	female	25 to 34	0	0	1	4	3	5	4	4	4	4	4	3	4	5	5	5	5	5	5	5	5		4	4	4	4	5	5	5	5	5	5	5	5	5	5	5	5	4	5	5		Equal Mix of Public and Private Sectors	4	4
374	NY	ROCHESTER, NY	female	18 to 24	0	0	1	4	4	3	4	3	4	3	4	4	4	4	4	4	3	4	4	3	4		4	4	4	3	4	4	4	4	3	4	3	4	4	3	3	4	4	3	3		Equal Mix of Public and Private Sectors	3	2
375	NJ	PHILADELPHIA	female	25 to 34	0	0	1	3	3	3	4	3	3	4	4	4	4	5	5	5	5	5	5	4	5		4	5	4	4	4	4	4	4	4	4	4	4	4	4	4	4	4	4	4		Equal Mix of Public and Private Sectors	3	3
376	NC	GREENVLL-SPART-ASHEVLL-AND	female	55 to 64	0	0	1	4	4	4	4	4	4	4	4	4	4	4	4	4	4	4	4	4	4		3	3	3	3	3	3	3	3	3	3	3	3	3	3	3	3	3	3	3		Equal Mix of Public and Private Sectors	3	3
377	DE	PHILADELPHIA	male	45 to 54	0	0	1	4	5	4	4	5	5	5	4	4	4	4	4	5	4	4	5	3	5		4	2	4	2	5	5	4	5	4	4	3	3	4	5	2	4	3	4	5		Equal Mix of Public and Private Sectors	1	4
378	MA	BOSTON (MANCHESTER)	female	18 to 24	1	1	0	5	4	3	4	5	5	4	3	5	5	4	4	3	5	4	4	4	5		4	4	4	4	3	4	4	4	4	4	3	3	3	4	4	5	4	5	4		Equal Mix of Public and Private Sectors	4	4
379	NJ	PHILADELPHIA	female	25 to 34	1	0	1	4	3	3	3	3	4	3	3	3	3	4	3	3	3	3	3	3	3		3	3	3	3	3	3	3	3	3	3	3	3	1	3	3	3	3	3	3		Equal Mix of Public and Private Sectors	3	3
380	MD	BALTIMORE	female	35 to 44	0	0	1	4	5	2	5	5	5	5	5	5	5	5	5	5	3	4	5	5	5		4	1	4	2	5	5	5	5	3	4	4	3	2	4	4	4	3	5	4	Hospitals	Entirely Public Sector	1	1
381	RI	PROVIDENCE-NEW BEDFORD	male	45 to 54	1	0	0	5	4	5	3	4	5	4	4	3	4	3	3	3	3	3	3	3	3		3	2	3	3	3	3	3	3	3	4	3	3	1	3	3	2	3	3	4		Equal Mix of Public and Private Sectors	1	4
382	NC	GREENSBORO-H.POINT-W.SALEM	female	45 to 54	0	0	1	5	5	5	5	5	5	5	5	5	4	5	5	5	3	5	5	3	5	measuring how far homes need to be moved, or walls built 5	5	5	5	5	5	5	5	5	5	5	3	4	4	5	5	5	3	5	5		Mostly Public Sector	1	1
383	NY	NEW YORK	male	18 to 24	1	0	1	2	1	5	1	3	5	5	4	2	1	1	1	4	4	4	1	2	4		3	1	3	3	5	4	4	4	1	3	3	1	1	1	1	1	1	1	1		Mostly Public Sector	1	1
384	SC	CHARLESTON, SC	female	55 to 64	1	0	0	4	1	5	2	3	5	5	3	5	4	2	5	4	4	4	2	4	4	Stop filling in wetlands!!! There used to be regulations against this, but, now, apparently if you have enough money you can build wherever you like.	5	5	3	4	5	5	5	5	3	5	5	3	4	4	4	3	2	4	1	I listed wetlands as not a priority because this is what they should be for.....to handle the water that comes in from rain, tides, or storms. They are nature's way of protecting other lands.	Equal Mix of Public and Private Sectors	5	5
385	CT	NEW YORK	male	65 and over	1	0	0	3	3	4	4	3	4	4	2	4	3	3	4	4	4	3	4	3	4		2	2	2	1	5	4	4	4	4	4	4	3	4	5	4	4	3	3	3		Equal Mix of Public and Private Sectors	4	4
386	FL		female	55 to 64	0	0	1	5	3	5	4	5	4	5	5	4	3	1	2	3	3	2	1	3	4		1	1	1	4	5	5	5	4	4	4	5	4	4	5	5	5	3	4	3		Equal Mix of Public and Private Sectors	2	3
387	MA	BOSTON (MANCHESTER)	female	45 to 54	1	0	0	4	4	5	4	5	4	5	4	4	3	3	2	3	3	4	2	2	2		2	1	1	2	4	4	3	4	3	4	2	4	4	4	2	3	3	5	2		Equal Mix of Public and Private Sectors	5	4
388	VA	WASHINGTON, DC (HAGRSTWN)	female	25 to 34	0	0	1	3	5	3	5	5	4	4	5	5	5	5	5	4	5	2	4	2	5	1 cost 2 research 3 time	3	2	4	4	5	5	5	5	4	5	5	2	1	2	3	2	3	4	3		Mostly Public Sector	3	4
389	FL	ORLANDO-DAYTONA BCH-MELBRN	male	65 and over	0	0	1	5	1	5	4	4	5	5	4	3	3	3	2	4	5	4	2	3	5		4	2	2	3	4	4	2	4	2	3	3	2	2	2	2	4	2	1	1		Mostly Private Sector	4	4
390	VA	ROANOKE-LYNCHBURG	female	35 to 44	0	0	1	5	3	5	4	5	5	5	4	4	3	5	5	5	5	5	5	3	5		3	3	3	3	5	5	5	5	4	5	5	5	5	5	5	5	5	5	5		Equal Mix of Public and Private Sectors	4	4
391	NC	GREENVLL-SPART-ASHEVLL-AND	female	45 to 54	1	0	0	2	3	3	5	5	5	5	3	4	3	2	5	4	5	2	5	2	5		5	3	4	5	5	5	1	5	4	5	1	2	2	4	4	5	1	5	5		Mostly Public Sector	4	3
392	NY	NEW YORK	female	18 to 24	0	0	1	4	4	4	5	4	4	4	4	5	5	5	5	5	4	5	5	3	5		3	5	4	4	5	5	5	4	4	2	4	4	4	5	4	5	3	3	5		Equal Mix of Public and Private Sectors	1	2
393	NC	RALEIGH-DURHAM (FAYETVLLE)	female	45 to 54	0	0	1	5	3	4	4	4	4	5	4	3	3	4	4	4	4	4	4	4	4	People believing or not	2	2	1	2	2	2	2	2	2	2	2	2	1	2	2	2	2	2	2		Equal Mix of Public and Private Sectors	3	3
394	NC	RALEIGH-DURHAM (FAYETVLLE)	female	25 to 34	1	0	1	5	4	5	5	4	5	4	5	5	5	4	5	5	4	5	4	5	4	none	5	5	5	5	4	5	4	5	5	4	4	5	5	5	5	5	5	5	4	none	Mostly Public Sector	4	5
395	NC	RALEIGH-DURHAM (FAYETVLLE)	female	65 and over	0	0	1	4	4	4	4	4	4	4	4	4	4	4	4	4	4	4	4	4	4		2	1	1	2	3	3	3	3	3	3	3	3	3	3	3	3	3	3	3		Equal Mix of Public and Private Sectors	3	3
396	FL	ORLANDO-DAYTONA BCH-MELBRN	female	25 to 34	0	1	1	5	4	5	4	5	5	5	5	5	5	5	4	5	4	5	4	4	5		4	5	5	4	4	5	5	4	5	4	5	4	4	5	4	4	4	4	5		Mostly Private Sector	5	5
397	NY	NEW YORK	female	25 to 34	0	1	0	3	4	4	4	4	3	3	4	3	4	4	4	5	3	4	3	4	4	5 flooding is important because it can be damaging to the infrastructure of human interaction	4	4	3	4	3	4	3	3	4	4	3	4	3	3	3	3	4	4	4		Mostly Private Sector	3	4
398	NJ	NEW YORK	male	25 to 34	1	1	1	5	5	5	4	5	5	5	5	5	5	4	4	4	5	5	5	4	5		4	4	4	5	5	5	5	5	5	5	5	5	3	5	5	4	4	4	5		Mostly Public Sector	3	5
399	MA	BOSTON (MANCHESTER)	male	25 to 34	0	0	1	4	4	4	4	4	5	3	3	5	4	4	5	5	4	3	4	5	4		4	2	2	3	5	4	4	3	4	4	4	4	3	4	4	3	3	3	4		Equal Mix of Public and Private Sectors	3	4
400	FL	MIAMI-FT. LAUDERDALE	female	18 to 24	1	0	0	1	5	5	4	4	4	5	5	5	4	5	5	5	5	5	5	5	5		2	1	2	2	5	4	2	4	5	5	3	2	1	2	1	3	3	5	5		Mostly Private Sector	2	1
401	MA	BOSTON (MANCHESTER)	female	18 to 24	0	1	0	2	3	2	5	2	1	2	2	4	2	3	3	4	4	2	2	1	2		1	4	5	2	5	3	2	4	4	3	3	3	5	3	5	3	4	3	3		Entirely Private Sector	1	1
402	ME	PORTLAND-AUBURN	female	55 to 64	1	0	0	5	5	4	5	5	4	4	5	5	5	5	5	5	5	5	4	2	5		2	2	3	3	5	5	5	5	5	5	5	4	5	5	4	5	5	5	5		Equal Mix of Public and Private Sectors	1	4
403	NY	NEW YORK	male	35 to 44	0	1	0	1	3	1	4	2	1	4	3	1	2	2	1	3	2	3	2	1	1	Funding	1	2	2	3	1	4	4	3	4	3	2	5	3	3	1	4	4	3	2		Mostly Private Sector	2	2
404	PA	PITTSBURGH	female	18 to 24	0	0	1	5	5	5	4	5	4	5	5	4	4	5	5	5	5	5	5	5	5		2	2	2	2	4	5	4	5	4	5	5	2	1	5	4	4	5	4	4		Equal Mix of Public and Private Sectors	3	3
405	NY	NEW YORK	female	25 to 34	0	1	1	3	3	3	3	3	3	3	3	3	3	3	3	3	3	3	3	3	3		3	2	4	2	3	3	3	3	3	3	3	3	3	3	3	3	3	3	3		Equal Mix of Public and Private Sectors	3	3
406	FL	ORLANDO-DAYTONA BCH-MELBRN	female	25 to 34	1	0	0	4	3	4	4	4	5	5	4	4	3	4	3	3	5	3	4	3	5		5	2	2	3	5	4	4	4	4	4	2	3	2	4	3	4	2	3	2		Equal Mix of Public and Private Sectors	5	2
407	VA	WASHINGTON, DC (HAGRSTWN)	female	35 to 44	0	0	1	4	5	2	5	5	5	4	5	5	5	5	5	4	3	4	4	1	5	Rating: 5 : Protecting and maintaining natural flood and SLR (Sea Level Rise) deterrents and barriers such as wetlands. When there are wetlands to sequester the additional water from floods and SLR, then there is less damage to property and people, and there is less SLR and flooding. Rating: 5: Keeping additional development to a minimum in order to preserve what wetlands and natural SLR barriers…	4	3	5	4	5	5	4	5	5	5	5	4	3	4	3	4	5	4	5	Rating 4 : Schools and Libraries, and other public education buildings. Rating 5 : Hospitals Rating 5 : Shelters (human and animal)	Mostly Public Sector	1	1
408	ME	PORTLAND-AUBURN	female	25 to 34	1	1	0	5	5	4	5	5	5	5	5	5	5	4	5	5	5	4	4	4	5		5	4	5	2	5	5	3	5	4	5	3	3	3	5	5	5	4	5	5		Equal Mix of Public and Private Sectors	3	2
409	FL	ORLANDO-DAYTONA BCH-MELBRN	female	45 to 54	1	0	0	5	1	5	5	3	5	5	4	5	5	4	4	4	4	4	4	4	4		3	3	3	3	5	5	2	4	2	4	2	2	3	5	3	5	2	4	4		Entirely Public Sector	1	3
410	FL	ORLANDO-DAYTONA BCH-MELBRN	female	35 to 44	0	0	1	5	5	5	5	5	5	5	5	5	5	5	5	5	5	5	5	5	5		4	5	5	4	5	4	4	5	4	5	4	4	5	4	4	4	4	5	5	the data company risk high protection	Entirely Public Sector	4	4
411	VA	ROANOKE-LYNCHBURG	female	18 to 24	0	0	1	5	4	3	4	3	2	4	2	4	4	4	4	4	4	2	4	5	3		2	4	4	3	5	4	4	2	4	4	2	3	2	2	5	3	3	4	5		Mostly Private Sector	3	4
412	NJ	PHILADELPHIA	female	45 to 54	1	1	0	5	3	5	5	5	4	4	4	5	3	4	5	5	5	4	5	3	5		5	5	5	4	5	5	5	5	4	5	5	4	5	5	4	4	3	5	4		Equal Mix of Public and Private Sectors	2	5
413	FL	TAMPA-ST. PETE (SARASOTA)	female	55 to 64	1	0	0	5	4	4	5	5	3	4	3	4	3	2	3	4	2	4	4	3	5		4	2	4	2	4	5	1	5	4	2	4	3	3	4	3	5	2	4	4		Equal Mix of Public and Private Sectors	3	4
414	SC	CHARLESTON, SC	female	45 to 54	1	0	0	5	2	3	3	4	4	5	4	5	2	4	3	2	5	1	4	3	5		3	1	2	2	5	5	1	2	2	2	1	1	1	3	3	4	3	3	3		Mostly Public Sector	4	1
415	CT	HARTFORD & NEW HAVEN	female	25 to 34	0	0	1	3	5	5	5	5	4	4	5	5	5	5	4	4	4	4	4	3	5		2	1	1	3	4	4	4	4	3	3	3	2	4	4	4	4	2	2	2		Equal Mix of Public and Private Sectors	4	3
416	SC	CHARLESTON, SC	female	18 to 24	1	0	0	5	3	3	5	3	4	3	4	4	4	3	5	4	4	4	4	3	5		4	4	4	3	4	3	3	4	4	4	1	4	2	4	3	3	3	5	5		Equal Mix of Public and Private Sectors	2	4
417	NY	NEW YORK	female	35 to 44	1	0	0	1	1	1	1	1	1	1	1	1	1	1	1	1	1	2	2	2	1	1 -- A place for evacuees to easily go to that will provide temporary comfort, food, water, shelter ... etc. 1 -- Emergency transportation service for those who without vehicles and who need medical assistance.	2	3	2	3	5	5	4	4	4	5	2	1	3	5	5	4	2	4	1	Animal shelter	Mostly Private Sector	3	3
418	FL	JACKSONVILLE	female	18 to 24	1	0	0	3	3	3	3	3	4	4	3	4	3	4	4	4	4	4	4	4	4	Flooding in the future	3	2	2	3	2	3	3	3	3	3	3	3	2	3	3	3	3	3	3	Pollution out of the water	Equal Mix of Public and Private Sectors	3	4
419	FL	ORLANDO-DAYTONA BCH-MELBRN	female	35 to 44	1	0	0	5	2	4	5	4	5	5	4	4	4	4	4	4	4	4	4	3	4		3	3	3	3	5	4	4	5	4	4	4	4	4	5	5	4	4	4	4		Equal Mix of Public and Private Sectors	2	3
420	SC	CHARLOTTE	male	25 to 34	1	0	0	3	1	4	4	1	3	2	2	2	2	2	3	1	2	3	2	3	2		2	4	3	3	4	5	5	4	2	5	4	4	2	3	4	4	2	5	4		Mostly Private Sector	2	1
421	PA	HARRISBURG-LNCSTR-LEB-YORK	female	65 and over	0	0	1	5	5	5	4	5	5	5	5	4	4	5	5	4	5	5	4	5	5	1. One important item is to let people know where to get help and assistance in case of a flood. Was very important to me when I lost everything I owned in the Agnes Flood of 1972.	3	1	1	3	5	5	5	4	4	4	4	4	4	5	5	5	4	2	5	Senior living residences	Equal Mix of Public and Private Sectors	4	2
422	MA	BOSTON (MANCHESTER)	female	18 to 24	0	0	1	4	4	3	5	5	3	4	4	4	3	4	4	3	4	4	5	3	4	Preparing an evacuation plan rate:4	4	3	3	3	4	4	4	3	4	5	4	3	4	4	5	5	4	4	4	The school system rate:5	Equal Mix of Public and Private Sectors	4	5
423	FL	ORLANDO-DAYTONA BCH-MELBRN	female	25 to 34	0	0	1	4	5	3	4	5	4	5	4	4	4	5	4	4	5	3	5	3	5		5	4	4	2	5	5	4	5	4	4	4	3	2	5	5	5	3	4	3		Equal Mix of Public and Private Sectors	3	3
424	PA	ERIE	male	45 to 54	1	0	0	5	4	4	2	4	5	4	4	2	2	5	5	5	4	4	5	2	5		2	2	3	2	5	4	4	3	4	2	3	4	2	4	3	2	2	2	1		Equal Mix of Public and Private Sectors	3	4
425	PA	HARRISBURG-LNCSTR-LEB-YORK	female	25 to 34	0	0	1	5	4	4	4	5	4	4	4	4	3	3	4	3	3	4	4	3	4		2	2	2	1	5	4	4	3	4	5	4	3	3	4	4	3	4	4	4		Equal Mix of Public and Private Sectors	2	2
426	VA	WASHINGTON, DC (HAGRSTWN)	male	35 to 44	0	0	1	1	2	2	1	1	2	1	3	1	1	5	5	5	4	4	4	5	5		5	4	3	4	4	5	5	4	4	5	5	4	4	4	3	5	5	5	5		Equal Mix of Public and Private Sectors	5	4
427	MA	BOSTON (MANCHESTER)	male	65 and over	0	0	1	5	2	5	5	5	5	5	5	5	2	3	4	4	4	3	5	3	4		3	2	2	2	5	5	5	5	3	5	5	3	4	5	4	5	3	4	5		Equal Mix of Public and Private Sectors	3	4
428	NY	ALBANY-SCHENECTADY-TROY	female	25 to 34	0	0	1	3	5	4	5	5	4	3	4	5	5	3	4	4	4	4	5	1	5		4	1	2	2	5	4	3	3	4	3	3	3	2	5	3	3	1	1	1		Equal Mix of Public and Private Sectors	5	4
429	FL	TAMPA-ST. PETE (SARASOTA)	female	18 to 24	1	0	0	2	1	2	2	2	2	2	2	2	2	2	2	2	1	1	1	2	2	N/a	4	4	4	3	5	5	5	5	5	4	4	5	4	5	5	5	5	5	5		Equal Mix of Public and Private Sectors	5	5
430	DC	WASHINGTON, DC (HAGRSTWN)	female	55 to 64	1	0	0	3	3	3	3	3	3	3	3	4	3	3	4	3	4	3	4	3	3		3	3	3	3	1	4	1	3	2	4	1	1	1	4	1	1	1	2	2		Equal Mix of Public and Private Sectors	3	3
431	PA	PHILADELPHIA	female	18 to 24	0	0	1	4	5	3	4	3	3	5	3	5	2	5	2	4	4	4	3	5	3		5	4	5	2	4	3	4	5	2	5	4	4	5	2	1	2	3	5	3		Entirely Public Sector	5	5
432	CT	HARTFORD & NEW HAVEN	female	25 to 34	1	1	1	3	4	3	4	4	4	4	4	4	4	5	4	4	4	4	5	3	4		4	3	4	3	3	4	4	3	4	4	4	3	3	4	4	4	4	5	4		Equal Mix of Public and Private Sectors	4	1
433	FL	WEST PALM BEACH-FT. PIERCE	male	25 to 34	1	0	1	5	4	4	4	5	4	4	4	4	5	4	4	4	5	4	5	4	5		4	3	5	4	4	5	3	4	5	4	4	3	4	4	4	4	5	5	4		Mostly Public Sector	4	5
434	FL	TAMPA-ST. PETE (SARASOTA)	female	35 to 44	1	0	0	1	1	1	1	1	1	1	1	1	1	2	2	1	1	1	2	2	1		5	4	4	3	4	4	3	3	4	4	1	3	3	5	3	4	4	5	3	Homeless people. 5	Mostly Public Sector	1	2
435	FL	JACKSONVILLE	female	35 to 44	1	0	0	5	4	5	5	5	5	5	5	5	4	5	5	5	4	5	5	4	5	educating the public about mandatory evacuation procedures 5	4	3	3	3	3	5	3	3	3	3	3	3	3	5	4	4	3	5	3		Equal Mix of Public and Private Sectors	3	2
436	DE	PHILADELPHIA	female	25 to 34	0	0	1	4	3	5	5	3	5	3	5	5	5	4	4	3	3	4	5	3	5		2	5	4	3	5	5	5	5	4	4	4	4	4	4	4	5	4	4	3		Equal Mix of Public and Private Sectors	5	4
437	NY	NEW YORK	male	65 and over	1	0	0	4	4	4	4	4	5	5	4	4	4	5	5	5	5	4	5	4	5		3	2	4	3	5	5	4	5	4	5	4	3	3	4	3	4	3	4	3		Mostly Public Sector	1	2
438	NJ	NEW YORK	female	55 to 64	0	0	1	1	1	1	1	1	1	2	1	1	2	5	5	4	5	5	5	3	5	People need to be educated 5 Evidence needs to be produced 5	3	2	3	2	5	5	5	5	4	5	5	4	4	5	5	5	4	5	4	N/A	Equal Mix of Public and Private Sectors	2	5
439	PA	WILKES BARRE-SCRANTON-HZTN	female	45 to 54	0	0	1	4	4	4	4	4	4	4	4	4	4	4	4	4	4	4	4	4	4		3	3	3	3	3	3	3	3	3	3	3	3	3	3	3	3	3	3	3		Mostly Public Sector	3	3
440	NY	NEW YORK	female	65 and over	0	0	1	4	4	4	5	5	5	5	4	4	4	4	4	3	3	4	4	3	5		1	1	1	2	4	4	4	5	4	4	4	5	5	4	4	5	5	5	5		Equal Mix of Public and Private Sectors	3	4
441	SC	GREENVLL-SPART-ASHEVLL-AND	female	35 to 44	0	0	1	5	2	4	5	4	5	4	4	4	4	4	5	5	5	4	5	2	5		5	5	5	2	5	4	3	4	4	4	1	4	3	5	5	4	3	4	3		Equal Mix of Public and Private Sectors	5	2
442	FL	WEST PALM BEACH-FT. PIERCE	male	65 and over	1	0	0	4	3	5	4	4	4	5	3	4	4	4	4	4	5	3	3	4	4		2	1	2	2	5	5	3	4	3	4	4	1	1	4	3	3	3	4	3		Equal Mix of Public and Private Sectors	2	3
443	VA	NORFOLK-PORTSMTH-NEWPT NWS	female	55 to 64	0	0	1	5	5	5	5	5	5	5	5	5	5	5	5	5	5	5	5	5	5		5	5	5	5	5	5	5	5	5	5	5	5	5	5	5	5	5	5	5		Equal Mix of Public and Private Sectors	5	5
444	NJ	NEW YORK	female	55 to 64	1	0	1	4	3	5	3	4	5	4	3	4	4	3	4	4	4	3	5	3	5		4	3	4	2	5	5	5	5	3	4	5	3	4	5	4	5	4	4	4		Equal Mix of Public and Private Sectors	1	2
445	VA	NORFOLK-PORTSMTH-NEWPT NWS	female	45 to 54	0	0	1	4	5	4	4	5	4	4	5	5	5	4	4	5	3	3	3	2	4	1. flood insurance 2. don't make houses in flood zones 3. sue builders who do 4. pay money to victims of builders 5. throw the criminals in jail	4	4	4	4	4	3	3	4	3	4	3	3	3	5	4	3	3	2	4		Equal Mix of Public and Private Sectors	1	1
446	NC	RALEIGH-DURHAM (FAYETVLLE)	female	25 to 34	0	0	1	3	3	3	3	3	3	3	3	3	3	3	3	3	3	3	3	3	4		1	1	2	2	3	3	3	2	2	3	2	2	2	3	2	2	2	2	2		Equal Mix of Public and Private Sectors	3	2
447	MD	BALTIMORE	male	65 and over	1	0	0	2	2	3	2	2	2	2	2	2	2	2	2	2	2	2	2	2	2		2	1	2	2	2	2	2	2	2	2	2	2	2	2	2	2	2	2	2		Mostly Public Sector	2	2
448	PA	PITTSBURGH	female	25 to 34	0	0	1	4	5	5	2	4	4	3	4	2	2	3	4	4	4	4	2	3	4	emergency routes 3	2	1	1	2	4	4	4	4	4	4	4	4	4	4	4	4	4	4	4		Mostly Public Sector	3	3
449	NJ	NEW YORK	female	35 to 44	1	0	1	5	5	5	5	5	5	5	5	5	5	5	5	5	5	5	5	5	5	That they urge people to take this seriously. I think many people who were not directly effected can go on with their daily lives and just block out what the obvious is becoming. Even those who were, we are just not use to living in an environment where there is an imminent life altering threat.	5	5	5	5	5	5	5	5	5	5	5	5	5	5	5	5	5	5	5	everything is important but I would think those infrastructures that are going to keep society and government moving along even through chaotic moments of disasters. Home bases, nerve centers, water, gas and electric, gas stations, food pantries, hospitals. Even schools. I think it is important to get children back in school as soon as possible to keep them in a normal state of activity, even if …	Equal Mix of Public and Private Sectors	4	5
450	SC	COLUMBIA, SC	female	18 to 24	0	0	1	5	1	1	5	3	5	5	4	5	2	3	5	5	4	4	2	3	3		5	5	4	3	4	3	4	3	3	3	2	3	3	2	3	3	3	1	2		Equal Mix of Public and Private Sectors	1	2
451	NC	RALEIGH-DURHAM (FAYETVLLE)	female	25 to 34	0	0	1	4	2	2	3	4	4	2	5	4	2	2	2	2	3	4	4	4	5	Preparing residents in case of flooding emergencies- 2	3	2	3	4	5	4	4	3	2	3	2	2	2	4	3	4	2	3	2	Schools=3	Equal Mix of Public and Private Sectors	2	1
452	NH	BURLINGTON-PLATTSBURGH	female	25 to 34	0	0	1	4	5	4	5	5	4	4	5	4	4	5	5	4	4	4	5	3	5	Building houses above sea level - 5 Developing emergency protocols- 4	3	3	3	2	5	5	4	4	3	4	3	3	2	5	4	4	4	4	5		Mostly Public Sector	2	3
453	RI	PROVIDENCE-NEW BEDFORD	female	65 and over	0	0	1	5	5	5	5	5	5	5	5	5	5	5	5	5	5	5	5	4	5		4	3	2	4	5	5	5	5	5	5	2	3	3	4	3	4	5	4	4		Entirely Public Sector	1	5
454	DC	WASHINGTON, DC (HAGRSTWN)	female	25 to 34	0	1	0	5	1	1	2	2	2	5	4	4	4	4	5	4	4	2	5	2	5		5	4	5	4	3	2	5	2	1	4	4	1	1	2	2	4	2	1	1		Mostly Private Sector	1	2
455	FL	TAMPA-ST. PETE (SARASOTA)	male	25 to 34	1	0	0	5	5	5	5	5	5	5	5	5	5	5	5	5	5	5	5	5	5		4	4	4	4	5	5	1	5	5	5	5	5	1	5	5	5	5	5	5		Mostly Public Sector	4	4
456	FL	GAINESVILLE	female	18 to 24	0	1	0	5	1	5	4	5	3	5	5	5	5	4	3	5	4	4	4	4	5	That is very important and it's a 9	4	4	5	4	5	4	4	5	4	5	5	4	4	5	4	5	5	5	5	Yes and that's kids & 10	Equal Mix of Public and Private Sectors	5	5
457	NY	NEW YORK	female	45 to 54	0	0	1	5	5	5	2	5	5	4	4	1	1	5	3	2	2	4	1	1	1	N/A	1	1	2	3	3	2	2	2	4	3	3	4	2	2	2	3	5	1	5	Solar and wind turbine grid protection	Equal Mix of Public and Private Sectors	1	3
458	FL	PANAMA CITY	male	65 and over	1	0	0	5	1	5	5	3	5	5	5	5	5	2	2	3	2	3	2	2	2		5	1	2	1	5	5	5	5	5	5	3	4	4	5	4	5	1	5	4		Equal Mix of Public and Private Sectors	2	4
459	FL	FT. MYERS-NAPLES	male	18 to 24	1	0	0	3	4	3	4	3	3	4	4	4	4	4	3	3	4	3	3	3	4		3	2	2	3	4	4	4	3	3	3	3	3	3	4	4	3	2	3	4		Equal Mix of Public and Private Sectors	3	3
460	MA	BOSTON (MANCHESTER)	female	25 to 34	0	0	1	4	3	4	4	4	5	5	4	3	3	4	4	5	4	4	4	2	5		1	1	1	2	4	4	4	2	2	4	4	3	1	3	2	3	2	2	2		Mostly Public Sector	4	2
461	SC	MYRTLE BEACH-FLORENCE	female	45 to 54	0	0	1	5	5	5	5	5	5	5	5	5	5	5	5	5	3	5	5	2	5		4	4	5	4	5	5	5	5	4	4	2	2	2	4	3	4	3	4	3	Animal Shelters and Zoos - 5	Equal Mix of Public and Private Sectors	1	2
462	NJ	NEW YORK	male	35 to 44	1	0	0	3	3	3	3	3	3	3	3	3	3	3	3	3	3	3	3	3	3		2	2	2	2	3	3	3	3	3	3	3	3	3	3	3	3	3	3	3		Equal Mix of Public and Private Sectors	3	3
463	NC	RALEIGH-DURHAM (FAYETVLLE)	female	25 to 34	0	0	1	2	2	2	2	1	2	2	1	2	1	2	3	3	2	2	2	3	2		3	3	3	3	4	3	3	4	3	4	3	2	2	4	4	3	4	4	4		Equal Mix of Public and Private Sectors	1	2
464	PA	HARRISBURG-LNCSTR-LEB-YORK	female	25 to 34	0	0	1	5	3	4	4	3	3	3	3	4	3	3	3	3	3	4	4	3	4		3	3	3	3	5	4	4	4	3	4	4	3	4	4	4	4	3	3	3		Equal Mix of Public and Private Sectors	3	4
465	MA	BOSTON (MANCHESTER)	female	18 to 24	1	1	0	4	5	4	4	4	3	3	3	4	2	4	4	4	4	2	4	3	4		2	1	1	1	5	3	4	3	3	3	3	3	3	4	3	3	2	3	2		Entirely Public Sector	3	4
466	MD	WASHINGTON, DC (HAGRSTWN)	female	25 to 34	1	1	0	3	3	3	3	3	3	3	3	3	3	3	3	3	3	3	3	3	3	Putting up barriers 5	3	2	3	2	3	3	3	3	3	3	3	3	3	3	3	3	3	3	3		Equal Mix of Public and Private Sectors	3	3
467	FL	ORLANDO-DAYTONA BCH-MELBRN	female	55 to 64	1	0	0	5	5	4	5	5	5	5	4	5	5	5	4	4	4	5	4	2	5		4	4	4	3	5	5	5	5	5	5	5	5	3	5	5	5	5	5	5		Equal Mix of Public and Private Sectors	4	3
468	NY	NEW YORK	female	18 to 24	1	0	0	5	5	5	1	5	3	2	2	3	1	3	3	3	3	3	3	3	3		2	2	2	2	3	5	2	5	2	5	5	2	3	4	5	4	5	1	1		Equal Mix of Public and Private Sectors	3	3
469	NY	NEW YORK	male	25 to 34	1	0	0	5	4	5	1	4	4	1	3	1	1	1	1	2	1	3	1	2	1		2	1	3	2	3	1	2	1	1	5	3	3	4	3	3	2	4	2	1	2. Neighborhood watch program	Entirely Public Sector	1	3
470	FL	MIAMI-FT. LAUDERDALE	female	45 to 54	1	0	0	4	3	4	4	4	4	4	4	4	3	3	4	4	3	3	3	4	4		5	5	5	5	5	5	5	5	5	4	3	4	5	4	3	5	3	5	5		Equal Mix of Public and Private Sectors	3	3
471	FL	ORLANDO-DAYTONA BCH-MELBRN	male	55 to 64	0	0	1	4	3	3	2	5	4	4	2	1	2	4	2	5	4	3	4	3	5		1	1	1	2	2	5	3	3	3	4	1	1	2	1	4	2	1	4	1		Equal Mix of Public and Private Sectors	2	3
472	FL	MOBILE-PENSACOLA (FT WALT)	female	25 to 34	1	0	0	5	3	3	4	4	4	2	3	3	3	2	4	4	2	3	4	3	5		5	4	5	3	5	5	4	5	5	5	5	5	5	5	4	5	5	5	5		Equal Mix of Public and Private Sectors	1	3
473	CT	NEW YORK	female	25 to 34	0	0	1	1	3	1	1	1	1	1	1	2	3	1	2	1	1	2	2	3	1	5. Even if it rains the main road is gone under water.	5	4	5	4	3	4	3	3	3	4	4	3	2	4	4	3	3	3	4	Na	Equal Mix of Public and Private Sectors	3	4
474	NY	WATERTOWN	female	35 to 44	0	0	1	5	4	3	5	5	5	4	4	4	5	5	5	4	5	4	4	4	4		4	4	4	2	5	3	3	5	3	4	4	3	4	4	4	4	3	2	5		Equal Mix of Public and Private Sectors	4	5
475	VA	WASHINGTON, DC (HAGRSTWN)	male	35 to 44	1	0	0	4	4	2	4	4	4	4	4	4	4	4	4	4	4	4	3	1	4		2	2	2	2	5	4	4	4	4	3	4	3	3	3	3	4	3	3	4		Equal Mix of Public and Private Sectors	4	3
476	NC	GREENSBORO-H.POINT-W.SALEM	female	18 to 24	0	0	1	4	4	4	3	5	5	3	4	3	3	5	4	5	4	5	3	3	4	teaching it in the schools beginning in elementary school, 4	3	3	4	3	5	5	5	5	5	5	5	3	2	5	4	5	4	4	5		Equal Mix of Public and Private Sectors	1	4
477	NY	NEW YORK	female	65 and over	1	1	1	5	4	4	4	4	1	4	4	1	4	4	4	4	4	4	4	2	4		2	2	3	3	5	4	4	5	4	3	3	4	2	4	4	5	2	4	3		Equal Mix of Public and Private Sectors	1	2
478	SC	CHARLESTON, SC	male	18 to 24	1	1	1	5	2	5	5	2	2	4	1	5	5	2	2	4	4	2	4	4	4		4	1	3	3	1	4	1	3	2	3	1	4	5	5	4	5	3	5	2		Equal Mix of Public and Private Sectors	1	3
479	MA	BOSTON (MANCHESTER)	male	25 to 34	0	0	1	2	1	1	2	1	2	1	2	2	1	3	4	4	4	4	3	4	4	Making sure everything is structurally sound	3	3	3	3	3	3	5	3	4	3	3	3	3	3	4	3	5	3	3	Protecting the environment	Equal Mix of Public and Private Sectors	3	3
480	PA	PITTSBURGH	female	25 to 34	0	1	0	4	5	4	5	5	3	5	1	3	4	4	5	3	5	4	4	3	3		5	3	4	4	4	5	3	5	4	4	5	3	5	3	5	4	5	4	4		Mostly Private Sector	4	3
481	PA	PITTSBURGH	male	55 to 64	0	0	1	5	4	5	5	5	5	5	5	5	5	1	1	1	1	1	1	1	1		2	1	1	1	5	5	5	5	5	5	5	3	3	5	4	5	3	3	3		Mostly Public Sector	4	5
482	PA	HARRISBURG-LNCSTR-LEB-YORK	female	18 to 24	0	0	1	4	5	4	4	5	4	4	4	5	4	4	4	4	4	4	3	4	4		4	4	4	3	4	4	4	4	3	3	3	3	3	4	3	4	2	2	3		Equal Mix of Public and Private Sectors	2	4
483	NC	RALEIGH-DURHAM (FAYETVLLE)	female	18 to 24	0	0	1	5	5	5	5	5	5	5	5	5	4	5	5	5	5	5	4	3	5		2	1	1	3	5	5	5	5	4	5	4	3	1	5	3	4	3	3	4		Mostly Public Sector	5	5
484	NY	NEW YORK	female	25 to 34	0	0	1	4	5	3	5	5	5	4	4	4	4	5	4	5	3	4	4	3	5	natural disasters	2	1	1	3	4	4	5	3	4	4	3	4	5	5	3	5	4	5	4		Equal Mix of Public and Private Sectors	3	3
485	PA	PHILADELPHIA	female	25 to 34	1	0	1	5	5	5	5	5	5	5	5	5	5	5	5	5	5	5	5	5	5	Every aspect and component of preparing is important. 5 Very important	2	2	2	2	5	3	4	3	5	4	4	4	5	4	4	2	4	3	3	Educational Institutions	Equal Mix of Public and Private Sectors	5	5
486	NY	NEW YORK	female	25 to 34	0	1	0	2	4	1	5	5	2	4	4	4	3	3	3	4	3	4	4	4	5		3	2	2	2	3	3	5	4	4	3	4	4	4	3	4	5	3	4	4		Mostly Public Sector	3	2
487	NJ	NEW YORK	male	55 to 64	0	1	0	5	4	5	5	5	5	5	5	5	5	5	5	5	5	5	5	5	5		3	2	2	3	5	5	5	5	5	5	5	5	5	5	5	5	5	5	5		Equal Mix of Public and Private Sectors	2	3
488	MA	BOSTON (MANCHESTER)	female	25 to 34	0	1	1	3	5	3	4	5	4	5	5	4	5	4	5	5	4	4	3	1	5	Reducin carbon emissions 5	5	2	5	3	5	4	5	5	4	4	4	3	3	3	2	4	3	3	5	Medical facilities 5	Equal Mix of Public and Private Sectors	1	1
489	NY	NEW YORK	female	25 to 34	1	0	0	5	4	4	4	4	4	4	5	5	5	5	4	5	5	4	4	5	4		5	4	4	5	4	5	5	4	5	5	5	5	4	5	4	4	4	4	4		Equal Mix of Public and Private Sectors	5	5
490	VA	RICHMOND-PETERSBURG	female	35 to 44	1	0	0	3	3	3	3	3	3	3	3	3	3	3	3	3	3	3	3	3	3		3	3	3	3	3	3	3	3	3	3	3	3	3	3	3	3	3	3	3		Equal Mix of Public and Private Sectors	3	3
491	MD	WASHINGTON, DC (HAGRSTWN)	female	25 to 34	1	0	1	4	5	4	5	4	4	5	4	5	5	5	4	3	4	4	4	4	5	Working with local nonprofits to ensure there are/will be "boots on the ground"	4	4	4	3	5	3	3	4	4	5	5	4	3	4	4	3	4	4	4	Historic and cultural sites	Equal Mix of Public and Private Sectors	3	5
492	NY	NEW YORK	female	65 and over	1	0	0	1	3	1	1	1	1	1	1	1	3	5	5	5	5	5	5	3	5		4	4	4	4	5	5	5	4	5	5	4	5	4	5	5	4	3	5	5		Equal Mix of Public and Private Sectors	3	3
493	MA	BOSTON (MANCHESTER)	male	25 to 34	1	1	1	3	3	3	3	3	3	4	4	3	4	3	4	3	3	4	3	3	3		4	4	4	3	4	3	4	4	4	3	4	4	3	4	3	3	4	5	4		Equal Mix of Public and Private Sectors	3	3
494	NY	NEW YORK	female	18 to 24	0	0	1	5	5	5	5	5	5	5	5	5	5	5	5	5	5	5	5	5	5	5-making all aware of what precautions are necessary	2	2	2	2	5	5	5	5	5	5	5	5	5	5	5	5	5	5	5	5 checking that all safety matters are working and in place	Equal Mix of Public and Private Sectors	5	5
495	NC	RALEIGH-DURHAM (FAYETVLLE)	female	18 to 24	1	0	0	3	2	2	2	1	2	2	2	2	2	1	2	2	2	2	2	2	2		1	1	1	1	5	5	3	2	2	2	2	2	1	4	2	2	1	3	3		Mostly Public Sector	3	2
496	NY	NEW YORK	male	35 to 44	0	0	1	5	4	4	5	5	4	4	4	4	4	5	5	4	4	5	5	3	4		4	2	3	1	5	4	2	4	3	4	3	4	2	4	4	2	2	4	2		Equal Mix of Public and Private Sectors	2	2
497	NJ	NEW YORK	male	25 to 34	0	0	1	4	4	4	4	3	4	5	4	4	4	5	4	4	4	3	4	3	4		4	4	3	4	4	5	4	5	4	5	4	4	3	4	3	5	4	3	5		Mostly Public Sector	4	4
498	NY	NEW YORK	female	35 to 44	0	0	1	5	4	4	5	5	5	5	4	5	5	3	4	3	3	4	5	2	5		4	4	4	3	5	5	5	5	3	4	5	5	4	4	4	3	3	4	5		Mostly Public Sector	3	3
499	NJ	PHILADELPHIA	female	25 to 34	0	0	1	5	3	5	4	5	4	4	5	4	4	4	4	4	4	4	4	3	4		5	3	4	3	4	3	4	3	3	4	3	4	2	3	3	4	3	4	3		Mostly Public Sector	5	4
500	SC	CHARLESTON, SC	male	25 to 34	1	0	0	4	5	2	5	5	5	4	4	5	4	5	5	5	3	4	3	4	4		4	5	5	4	2	2	2	3	2	3	3	4	2	3	4	2	3	4	2		Mostly Public Sector	2	2
501	PA	PHILADELPHIA	male	25 to 34	0	0	1	3	4	2	3	5	5	5	5	2	5	5	5	4	5	5	2	4	3		2	4	4	2	5	3	5	5	5	4	5	2	4	5	4	4	4	3	5		Equal Mix of Public and Private Sectors	2	2
502	FL	JACKSONVILLE	female	35 to 44	1	0	0	5	4	5	5	4	4	4	4	4	4	4	4	4	3	4	5	3	5		3	2	2	3	5	5	4	4	4	4	4	4	5	5	3	5	4	5	4		Equal Mix of Public and Private Sectors	2	4
503	MA	BOSTON (MANCHESTER)	female	18 to 24	0	0	1	4	3	5	3	5	4	5	4	4	4	4	4	5	3	4	4	5	5		3	4	5	4	3	5	4	4	4	4	4	3	5	5	4	4	4	3	3		Equal Mix of Public and Private Sectors	5	4
[truncated: 38 more columns]
